# Supplementary material for: Synthesis, characterization, photophysics, and anion binding properties of gold(i) acetylide complexes with amide groups
Source: Royal Society of Chemistry journal article supplement (doi:10.1039/c4nj01294a), 2014-01-01
Supplement: c4nj01294a1.pdf [file c4nj01294a1.pdf]

## Supporting Information

### **Synthesis, Characterization, Photophysics, and Anion Binding Properties of Gold(I) Acetylide Complexes with Amide Group**

Hua-Yun Shi, Jie Qi, Zhen-Ze Zhao, Wen-Juan Feng, Yu-Hao Li, Lu Sun, Zhuo-Jia Lin, Hsiu-Yi Chao\*

*MOE Key Laboratory of Bioinorganic and Synthetic Chemistry, School of Chemistry and Chemical Engineering, Sun Yat-Sen University, Guangzhou 510275, P. R. China*

**Table S1.** Crystallographic data for **3a**

---

|                                                         |                                                                   |
|---------------------------------------------------------|-------------------------------------------------------------------|
| Formula                                                 | C <sub>33</sub> H <sub>24</sub> AuN <sub>2</sub> O <sub>3</sub> P |
| M (g/mol)                                               | 724.48                                                            |
| cryst syst                                              | Triclinic                                                         |
| space group                                             | P $\bar{1}$                                                       |
| a (Å)                                                   | 8.7748(18)                                                        |
| b (Å)                                                   | 9.1491(18)                                                        |
| c (Å)                                                   | 17.558(4)                                                         |
| $\alpha$ (°)                                            | 93.54(3)                                                          |
| $\beta$ (°)                                             | 97.12(3)                                                          |
| $\gamma$ (°)                                            | 98.33(3)                                                          |
| V (Å <sup>3</sup> )                                     | 1379.4(5)                                                         |
| Z                                                       | 2                                                                 |
| D <sub>c</sub> (g cm <sup>-3</sup> )                    | 1.744                                                             |
| T (K)                                                   | 173(2)                                                            |
| reflns collected                                        | 10395                                                             |
| indep reflns                                            | 5257                                                              |
| R <sub>int</sub>                                        | 0.0385                                                            |
| R, <sup>a</sup> R <sub>w</sub> <sup>b</sup> [I > 2σ(I)] | 0.0345, 0.0854                                                    |
| GOF                                                     | 0.768                                                             |

---

$$^a R = \Sigma(|F_o| - |F_c|) / \Sigma|F_o|. \quad ^b R_w = [\Sigma w(|F_o| - |F_c|)^2 / \Sigma w|F_o|^2]^{1/2}.$$

**Table S2.** Binding constants of **4a–4d** with anions in CDCl<sub>3</sub><sup>a</sup>

| ligand    | F <sup>-</sup> | Cl <sup>-</sup> | OAc <sup>-</sup> | Br <sup>-</sup> | I <sup>-</sup> |
|-----------|----------------|-----------------|------------------|-----------------|----------------|
| <b>4a</b> | <i>b</i>       | 220.81 ± 15.22  | 188.82 ± 13.14   | 167.21 ± 16.58  | 71.03 ± 4.75   |
| <b>4b</b> | <i>b</i>       | 97.15 ± 7.7     | 54.22 ± 3.04     | 46.74 ± 7.30    | 31.56 ± 2.12   |
| <b>4c</b> | <i>b</i>       | 28.43 ± 2.62    | 22.13 ± 2.69     | 18.82 ± 1.62    | 3.83 ± 2.45    |
| <b>4d</b> | <i>b</i>       | 33.13 ± 1.64    | 20.53 ± 1.27     | 19.1500 ± 1.75  | 13.00 ± 0.61   |

<sup>a</sup>Binding constants were determined by 1:1 model using nonlinear fitting methods.

<sup>b</sup>Chemical shifts were not suitable for accurate measurement of binding constant.

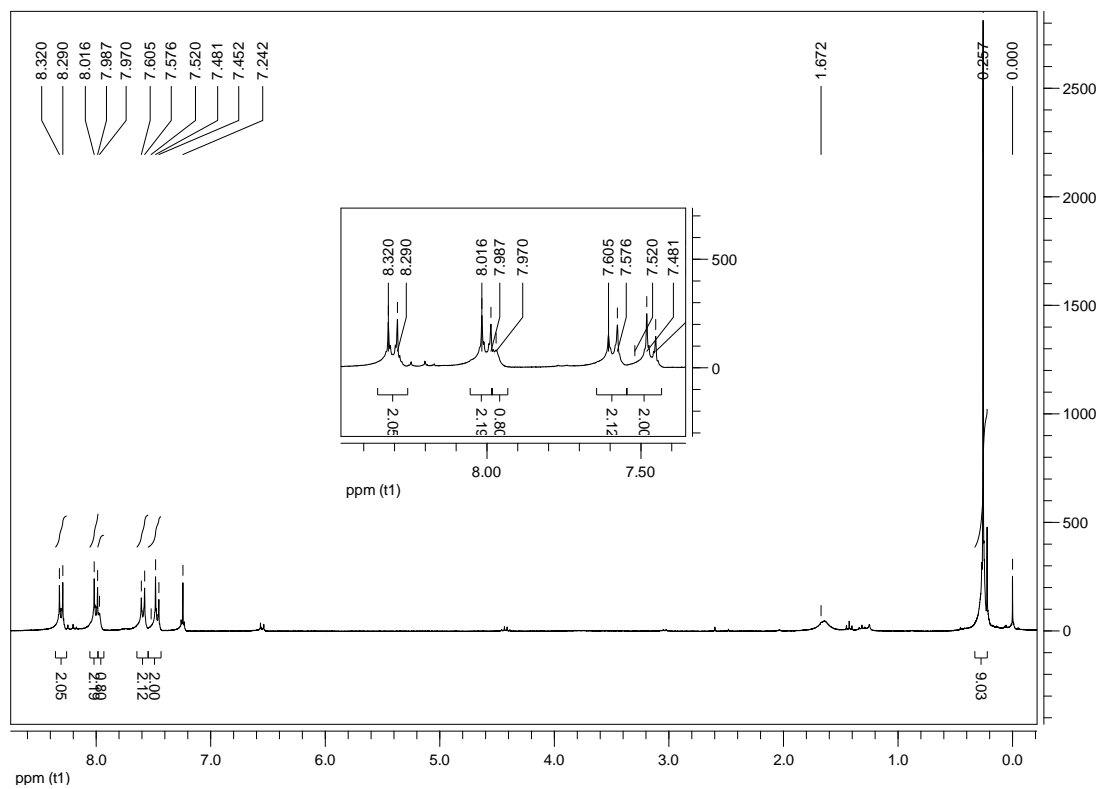

Figure S1. The <sup>1</sup>H NMR spectrum of **2a** in CDCl<sub>3</sub> at 298 K.

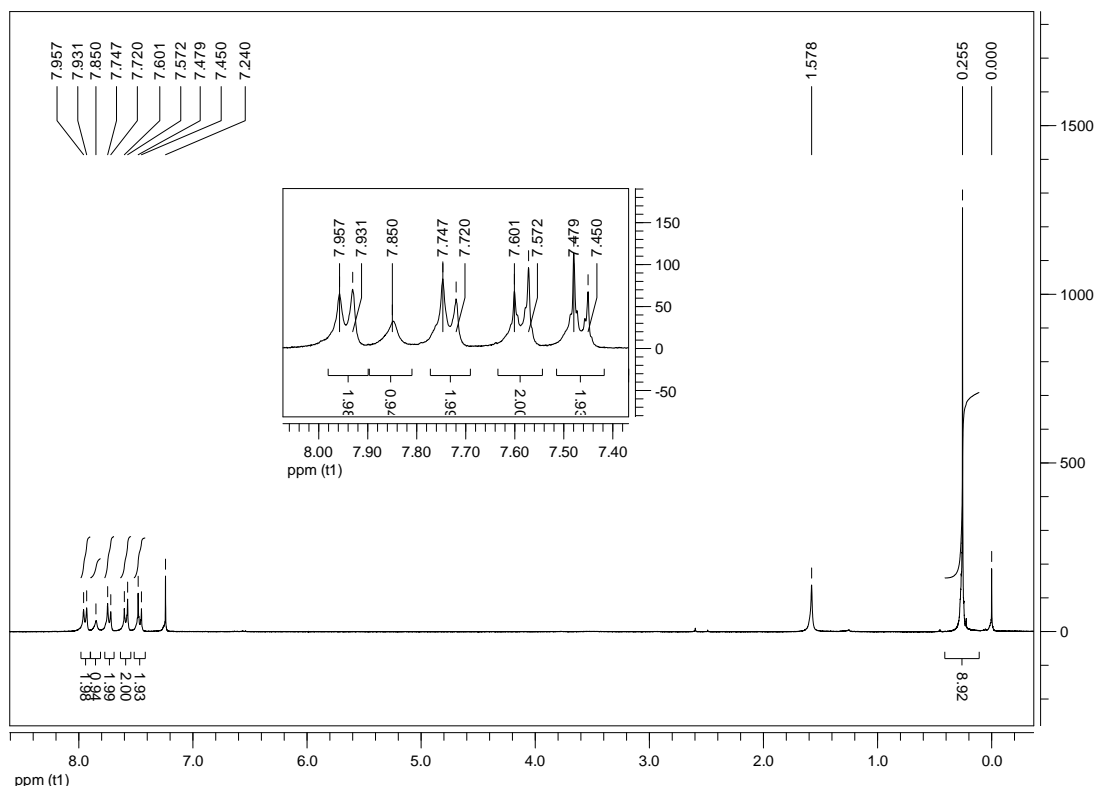

Figure S2. The <sup>1</sup>H NMR spectrum of **2b** in CDCl<sub>3</sub> at 298 K.

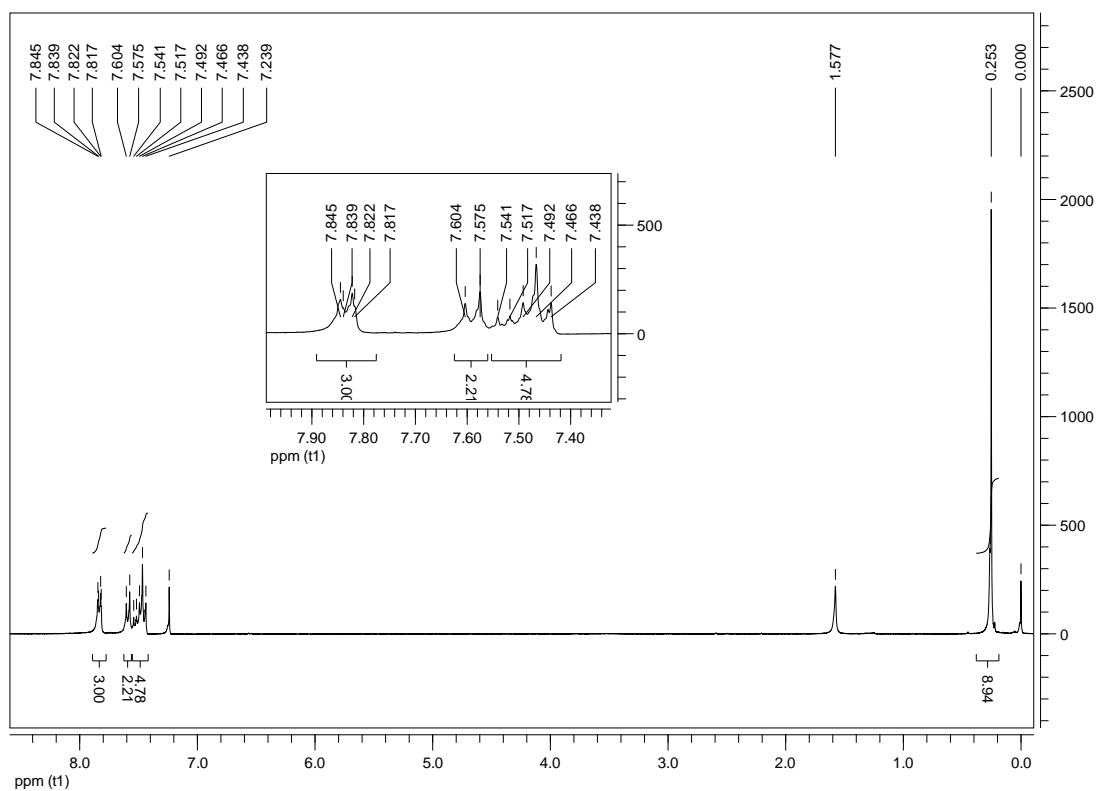

**Figure S3.** The  $^1\text{H}$  NMR spectrum of **2c** in  $\text{CDCl}_3$  at 298 K.

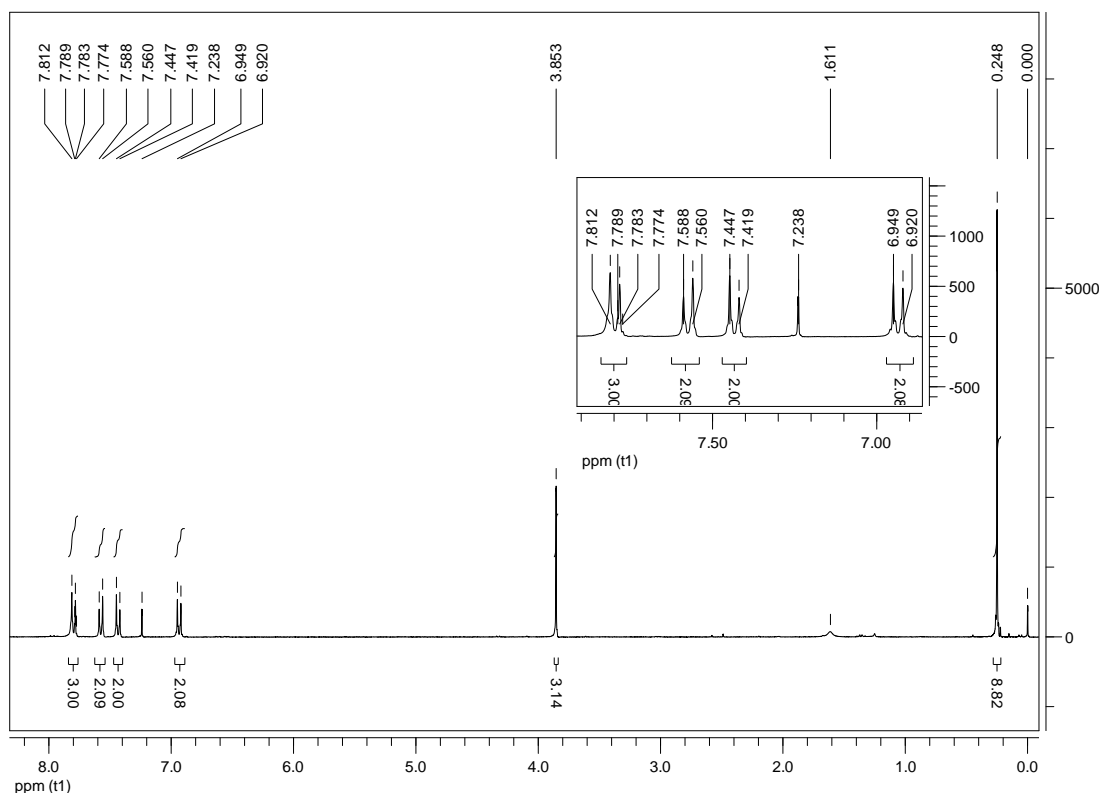

**Figure S4.** The  $^1\text{H}$  NMR spectrum of **2d** in  $\text{CDCl}_3$  at 298 K.

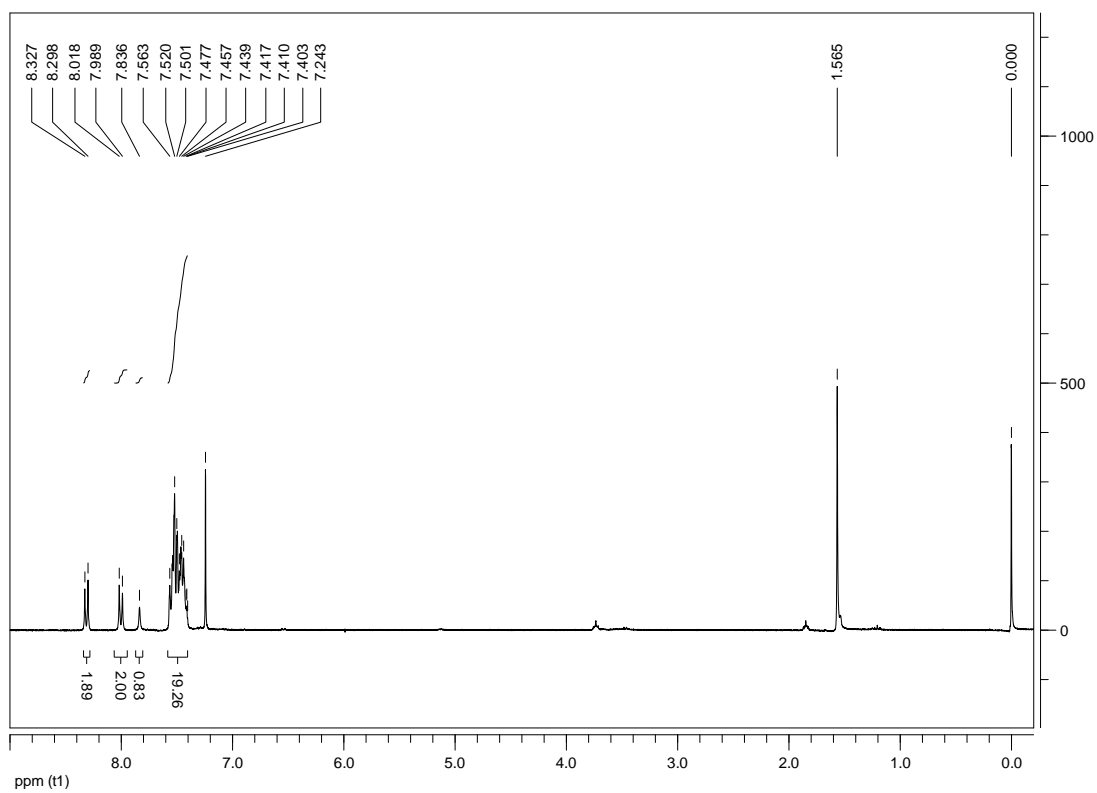

**Figure S5.** The  $^1\text{H}$  NMR spectrum of **3a** in  $\text{CDCl}_3$  at 298 K.

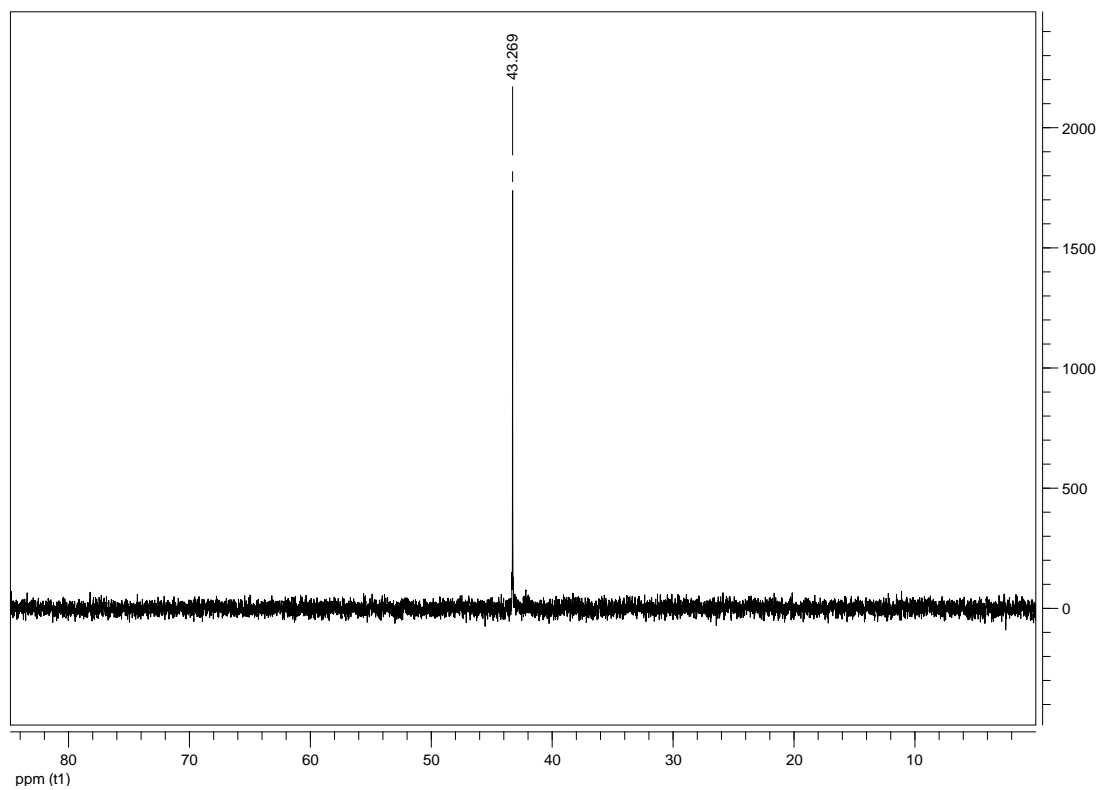

**Figure S6.** The  $^{31}\text{P}$  NMR spectrum of **3a** in  $\text{CDCl}_3$  at 298 K.

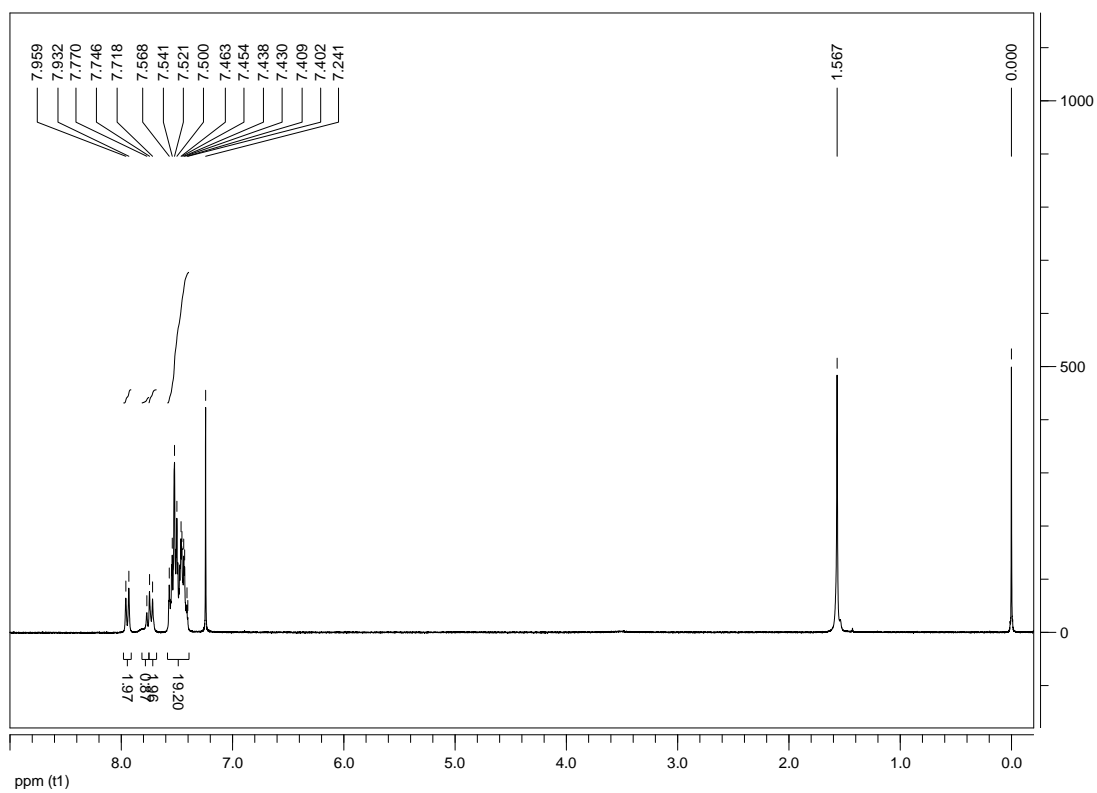

**Figure S7.** The  $^1\text{H}$  NMR spectrum of **3b** in  $\text{CDCl}_3$  at 298 K.

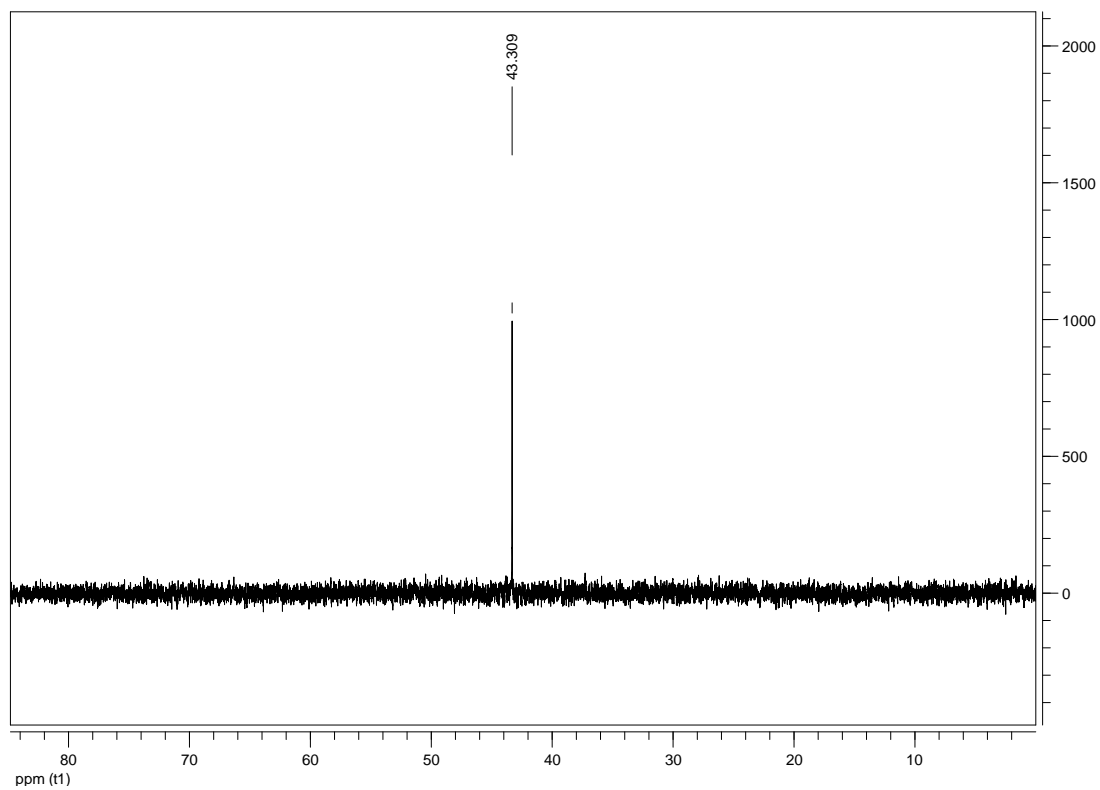

**Figure S8.** The  $^{31}\text{P}$  NMR spectrum of **3b** in  $\text{CDCl}_3$  at 298 K.

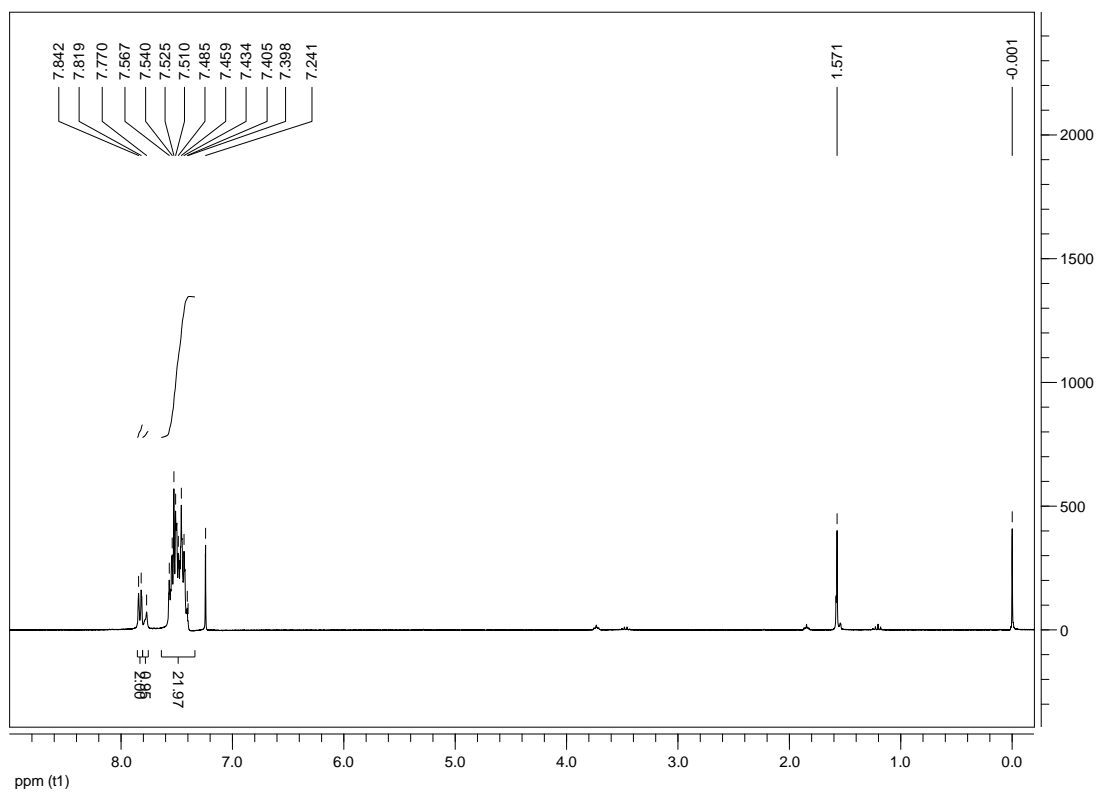

**Figure S9.** The  $^1\text{H}$  NMR spectrum of **3c** in  $\text{CDCl}_3$  at 298 K.

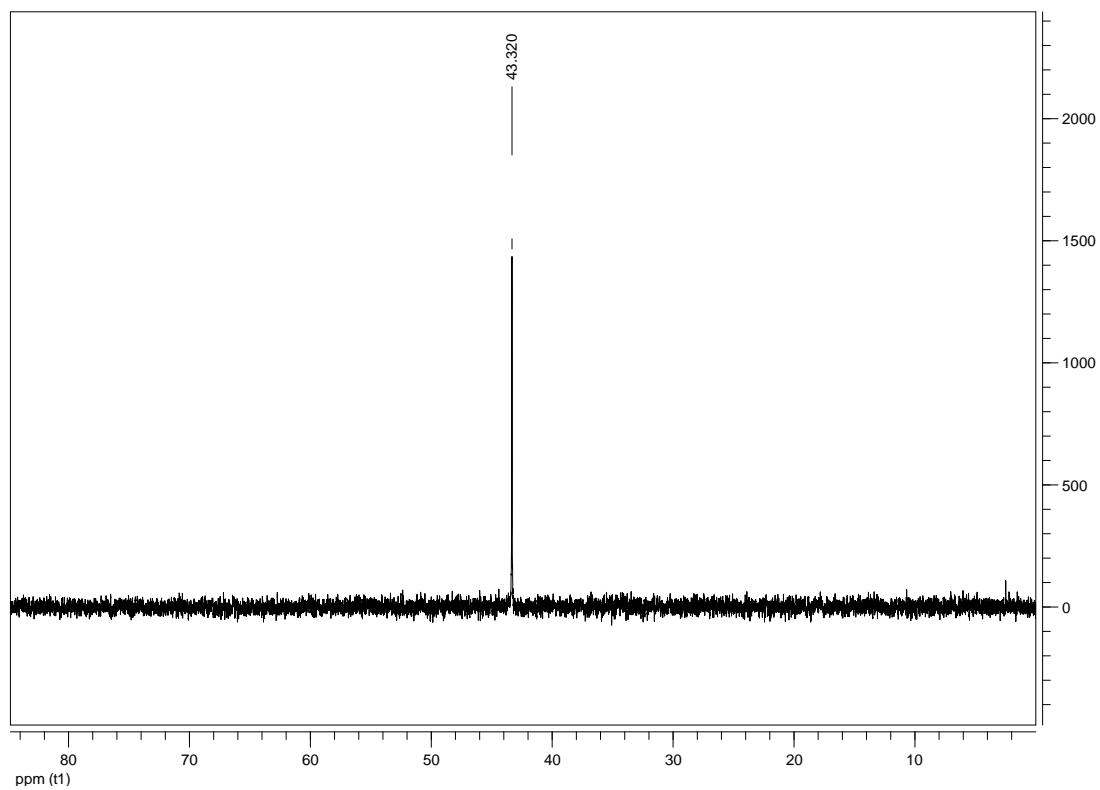

**Figure S10.** The  $^{31}\text{P}$  NMR spectrum of **3c** in  $\text{CDCl}_3$  at 298 K.



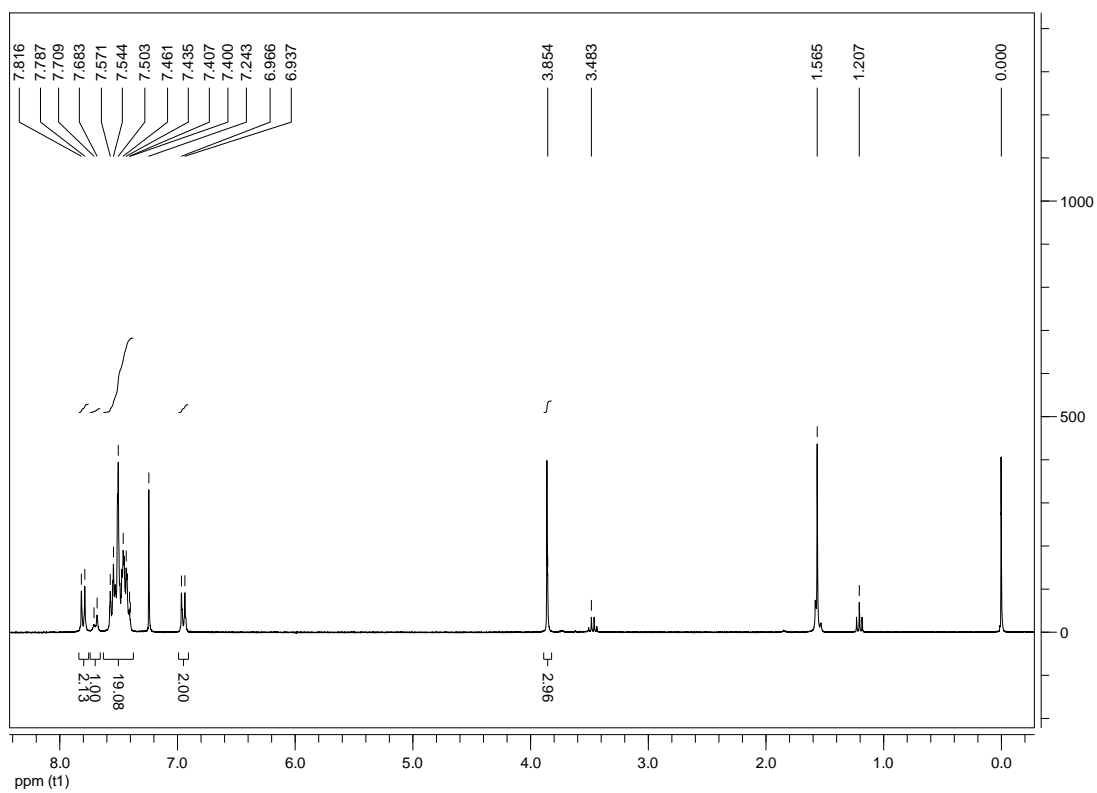

**Figure S11.** The  $^1\text{H}$  NMR spectrum of **3d** in  $\text{CDCl}_3$  at 298 K.

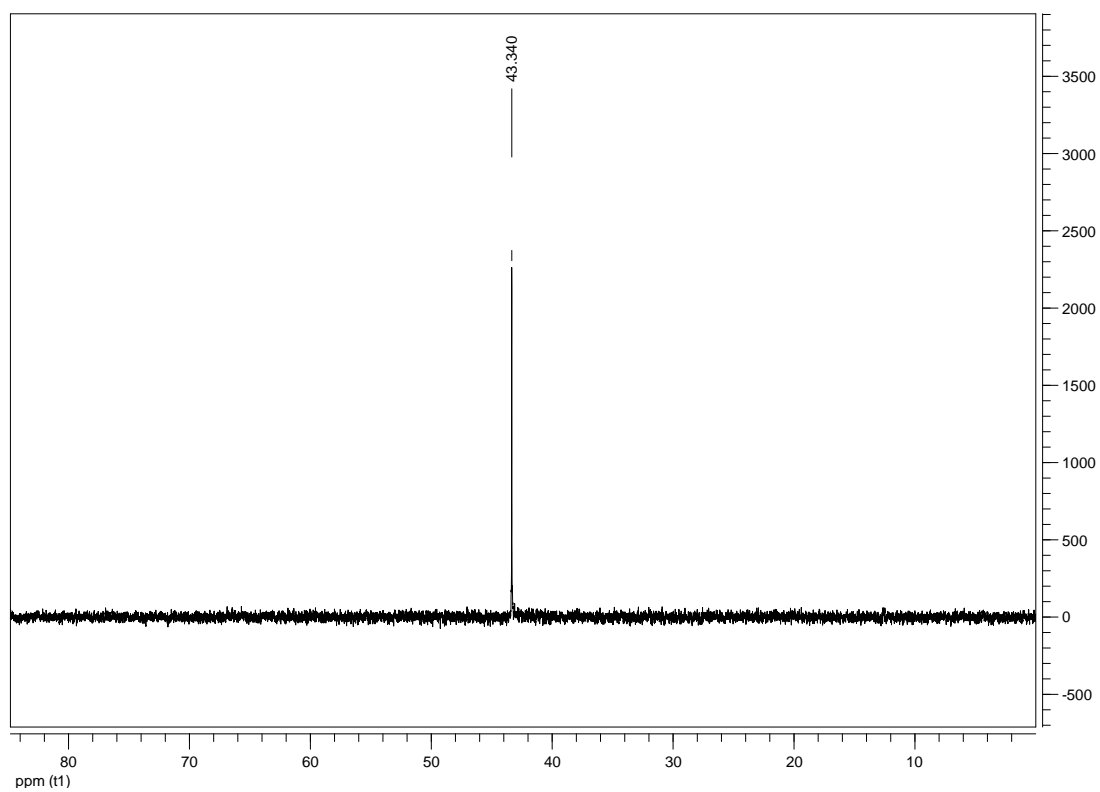

**Figure S12.** The  $^{31}\text{P}$  NMR spectrum of **3d** in  $\text{CDCl}_3$  at 298 K.

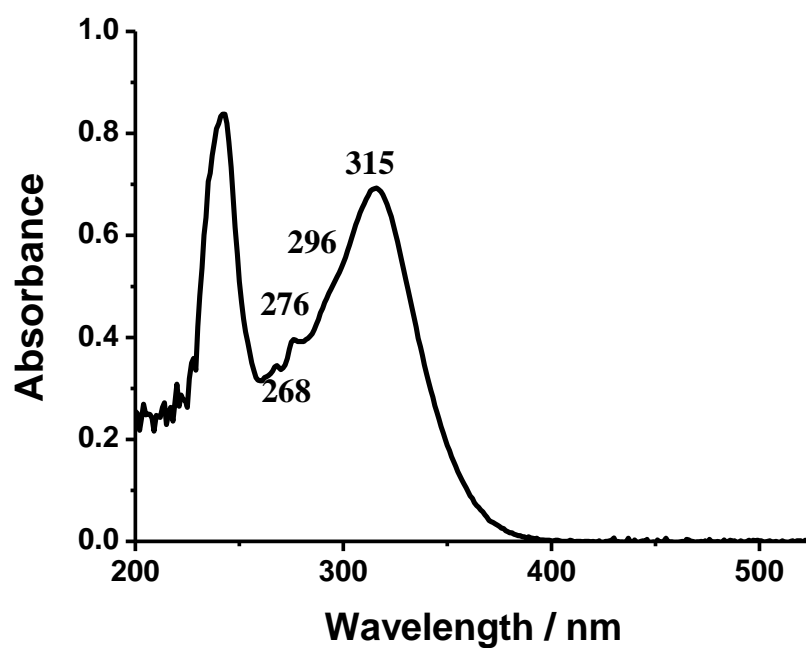

**Figure S13.** Electronic absorption spectrum of **3b** ( $1.98 \times 10^{-5}$  mol dm<sup>-3</sup>) in THF at 298 K.

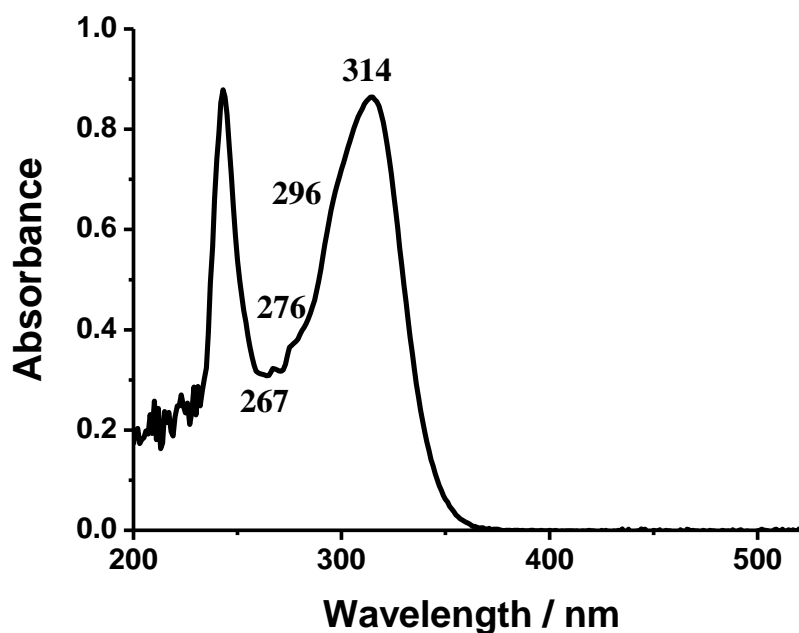

**Figure S14.** Electronic absorption spectrum of **3c** ( $1.98 \times 10^{-5}$  mol dm<sup>-3</sup>) in THF at 298 K.

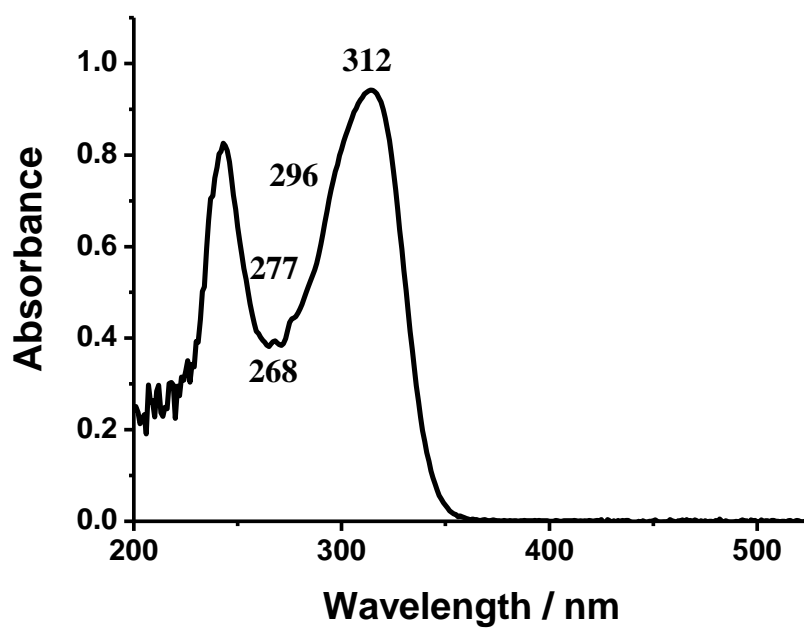

**Figure S15.** Electronic absorption spectrum of **3d** ( $1.98 \times 10^{-5}$  mol dm $^{-3}$ ) in THF at 298 K.

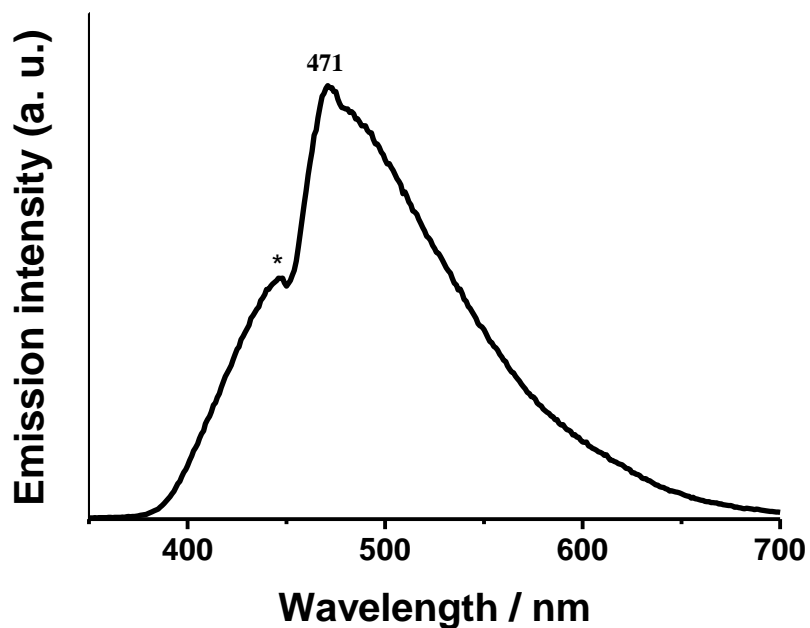

**Figure S16.** Emission spectrum of **3b** in the solid state at 298 K ( $\lambda_{\text{ex}} = 330$  nm).

\* denotes the artificial peak from the instrument

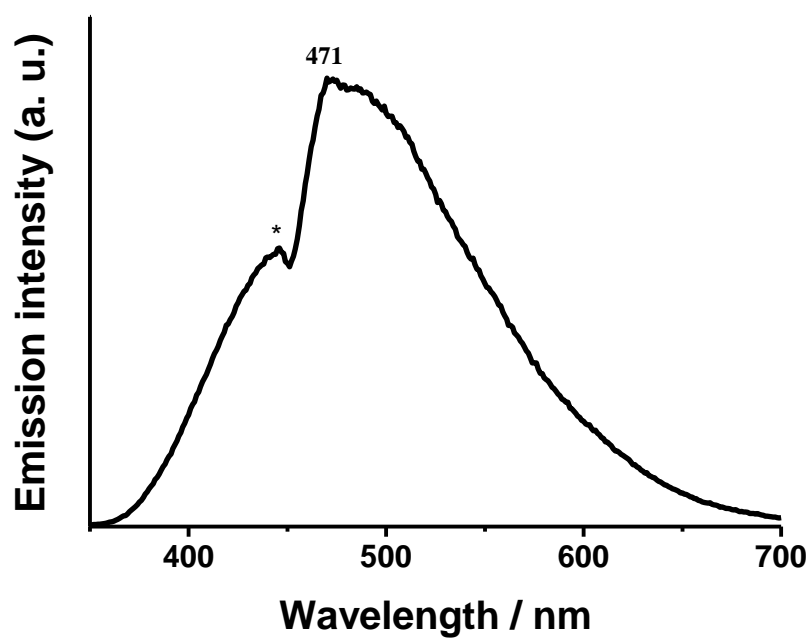

**Figure S17.** Emission spectrum of **3c** in the solid state at 298 K ( $\lambda_{\text{ex}}=315$  nm).

\* denotes the artificial peak from the instrument

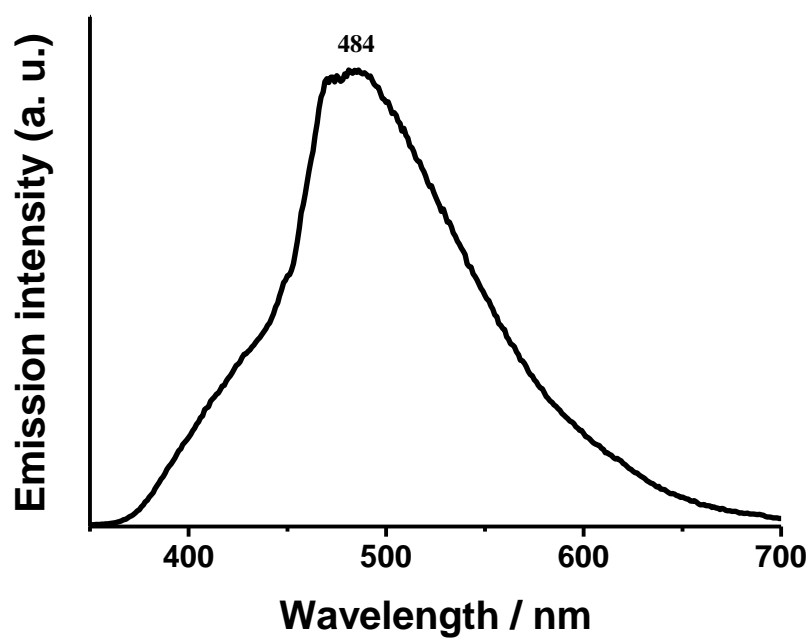

**Figure S18.** Emission spectrum of **3d** in the solid state at 298 K ( $\lambda_{\text{ex}}=315$  nm).

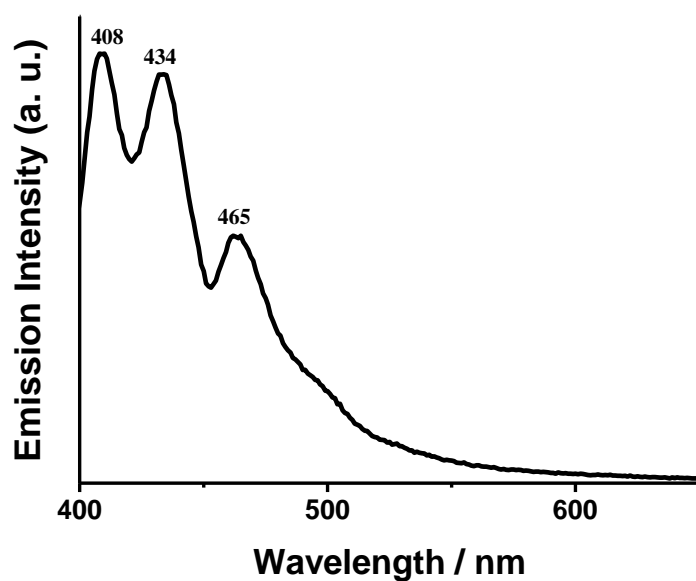

**Figure S19.** Emission spectrum of **3a** ( $1.98 \times 10^{-5}$  mol dm $^{-3}$ ) in THF at 298 K ( $\lambda_{\text{ex}} = 330$  nm).

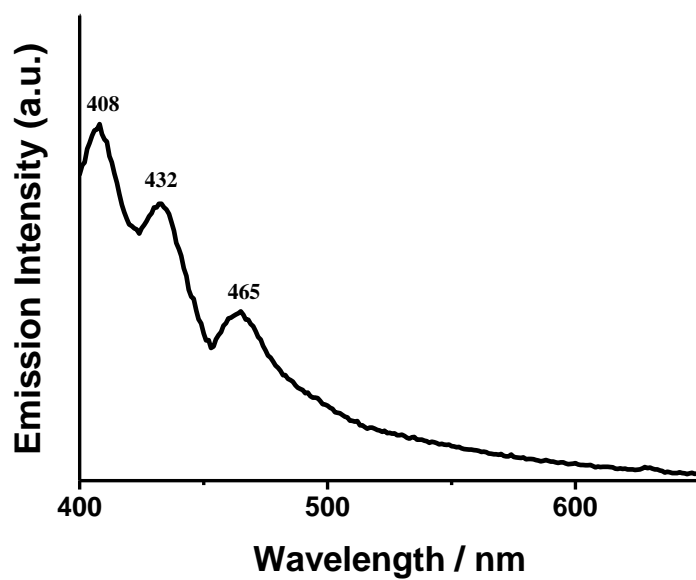

**Figure S20.** Emission spectroscopy of **3b** ( $1.98 \times 10^{-5}$  mol dm $^{-3}$ ) in THF at 298 K ( $\lambda_{\text{ex}} = 315$  nm).

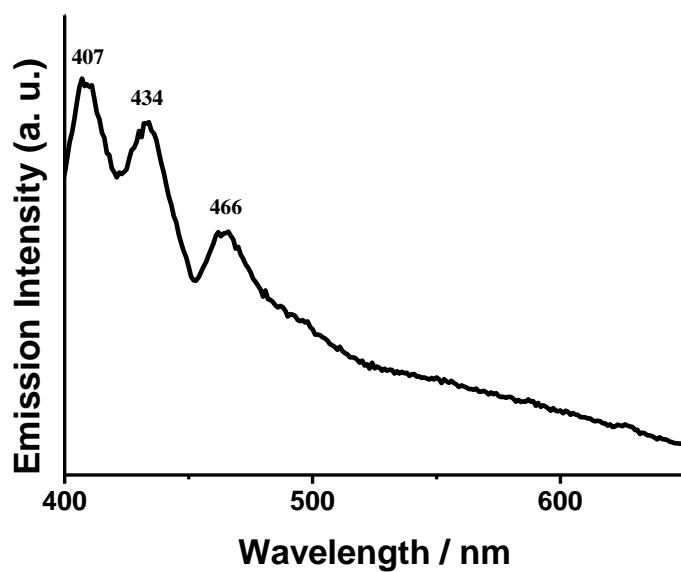

**FigureS21.** Emission spectrum of **3c** ( $1.98 \times 10^{-5}$  mol dm<sup>-3</sup>) in THF at 298 K ( $\lambda_{\text{ex}} = 315$  nm).

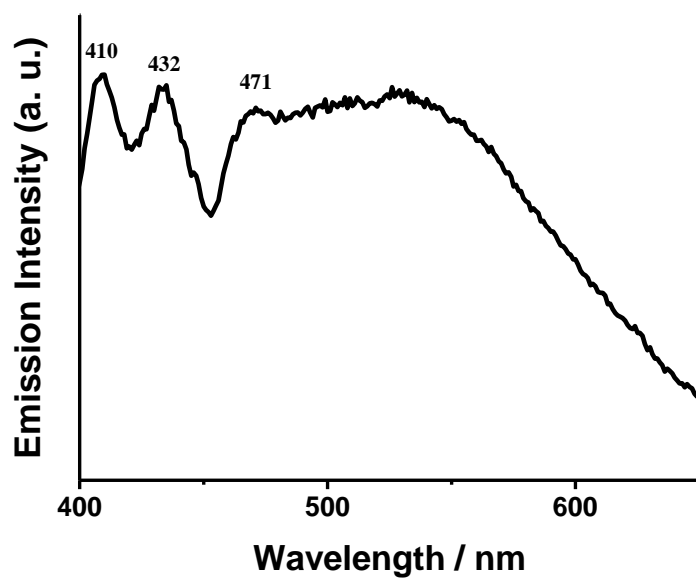

**FigureS22.** Emission spectrum of **3d** ( $1.98 \times 10^{-5}$  mol dm<sup>-3</sup>) in THF at 298 K ( $\lambda_{\text{ex}} = 315$  nm).

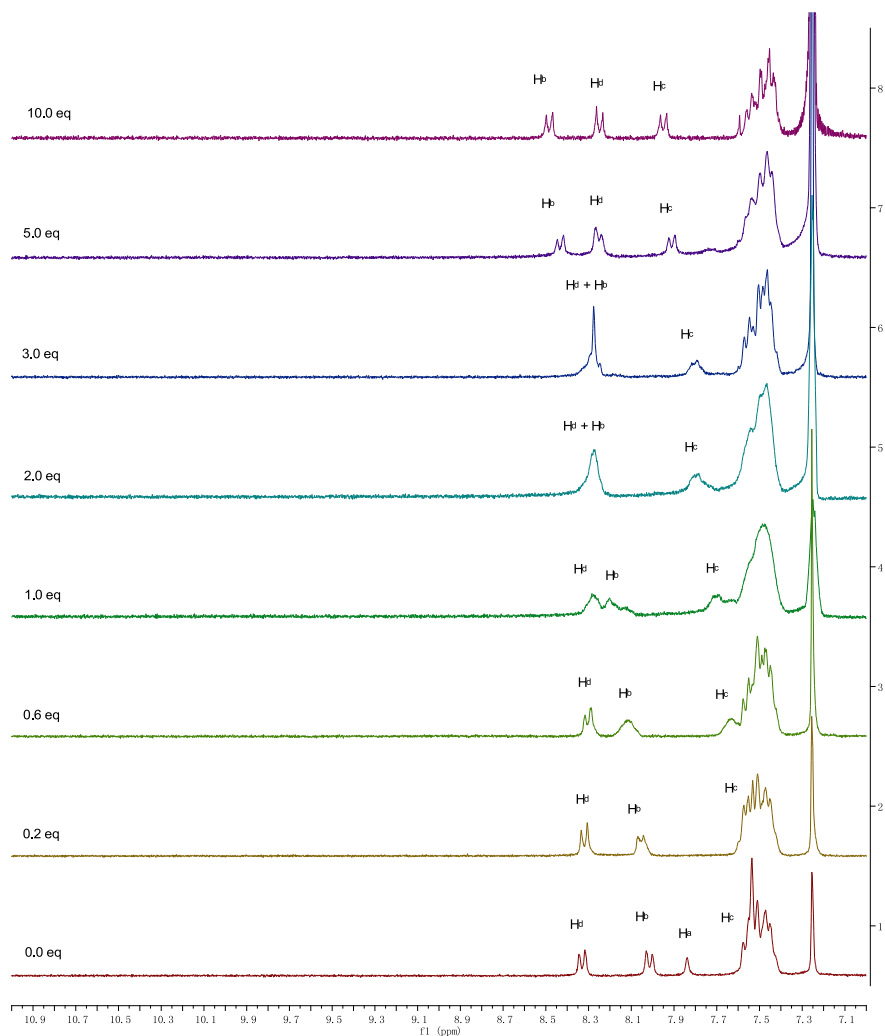

**Figure S23.** The <sup>1</sup>H NMR spectral changes of **3a** upon addition of F<sup>-</sup> in CDCl<sub>3</sub> at 298 K.

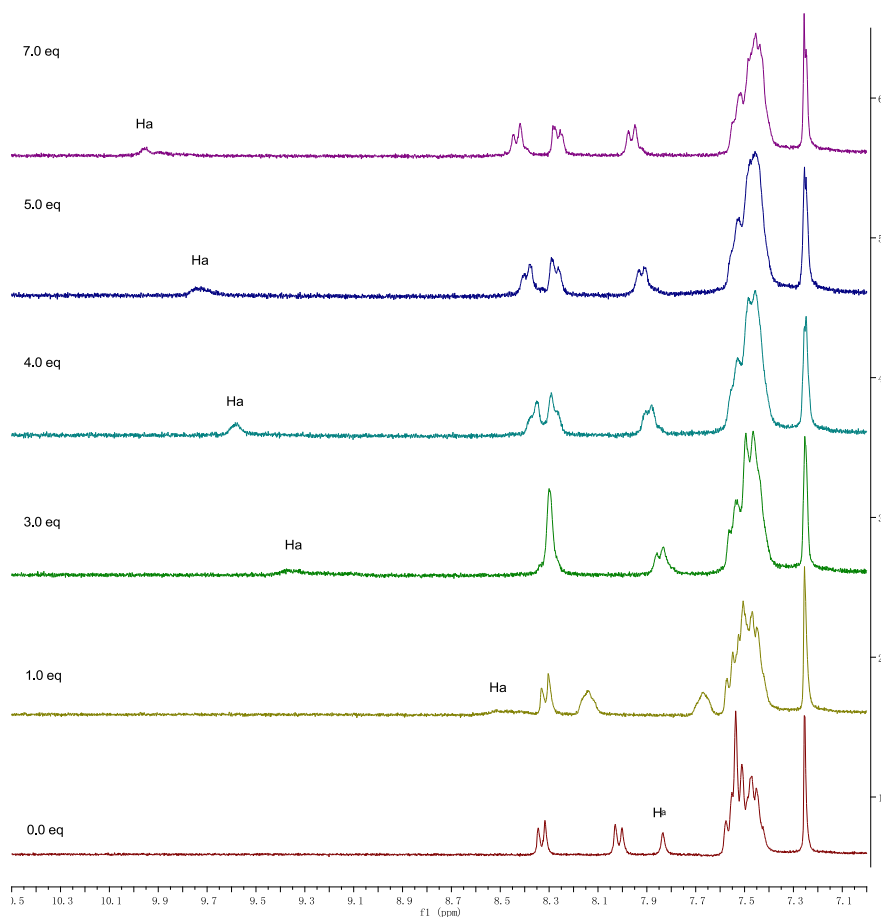

**Figure S24.** The <sup>1</sup>H NMR spectral changes of **3a** upon addition of Br<sup>-</sup> in CDCl<sub>3</sub> at 298 K.

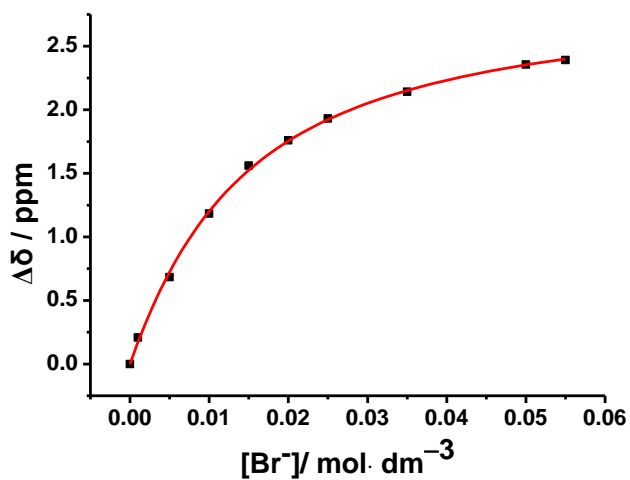

**Figure S25.** A plot of the chemical shift change of amide proton H<sub>a</sub> as a function of [Br<sup>-</sup>] and its theoretical fit for the 1:1 binding of **3a** with Br<sup>-</sup>.



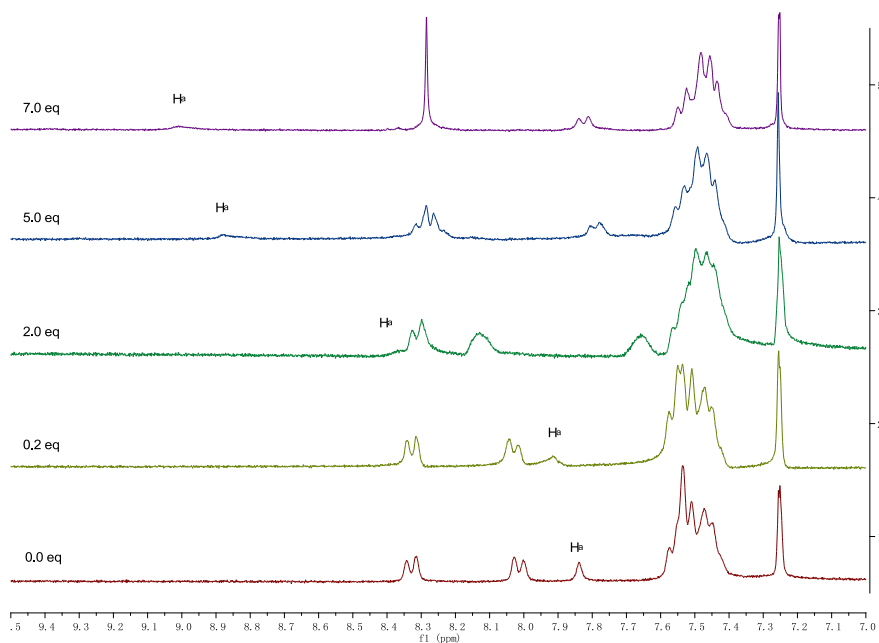

**Figure S26.** The  $^1\text{H}$  NMR spectral changes of **3a** upon addition of  $\Gamma$  in  $\text{CDCl}_3$  at 298 K.

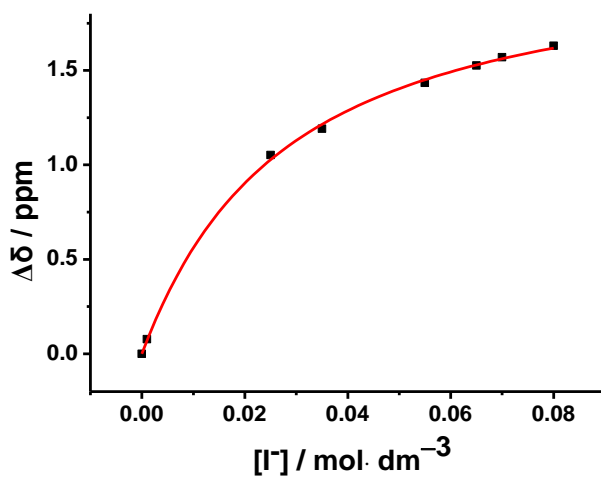

**Figure S27.** A plot of the chemical shift change of amide proton  $\text{H}_a$  as a function of  $[\Gamma]$  and its theoretical fit for the 1:1 binding of **3a** with  $\Gamma$ .

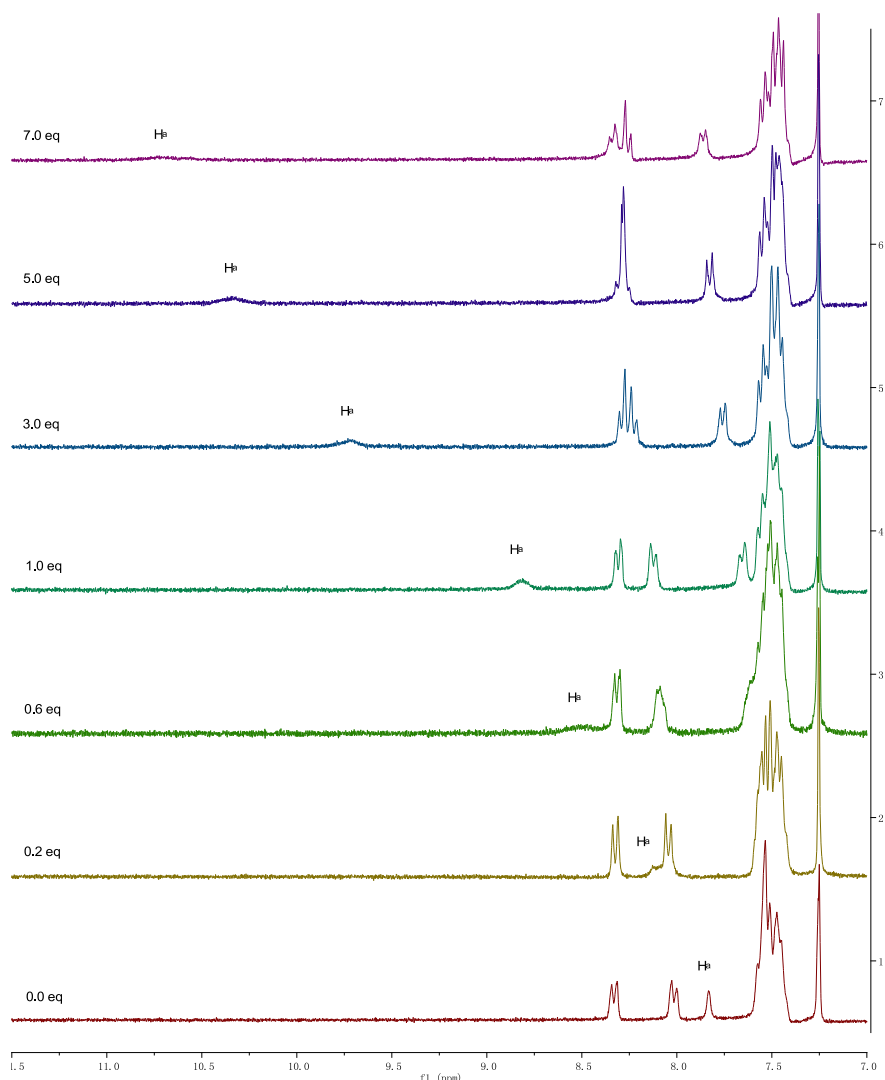

**Figure S28.** The <sup>1</sup>H NMR spectral changes of **3a** upon addition of OAc<sup>-</sup> in CDCl<sub>3</sub> at 298 K.

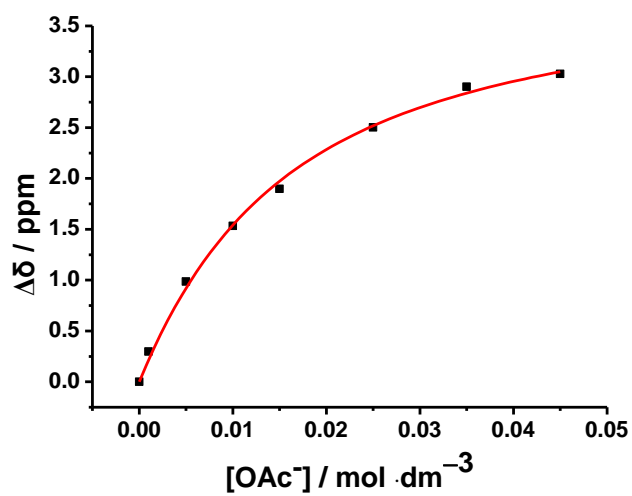

**Figure S29.** A plot of the chemical shift change of amide proton H<sub>a</sub> as a function of [AcO<sup>-</sup>] and its theoretical fit for the 1:1 binding of **3a** with AcO<sup>-</sup>.

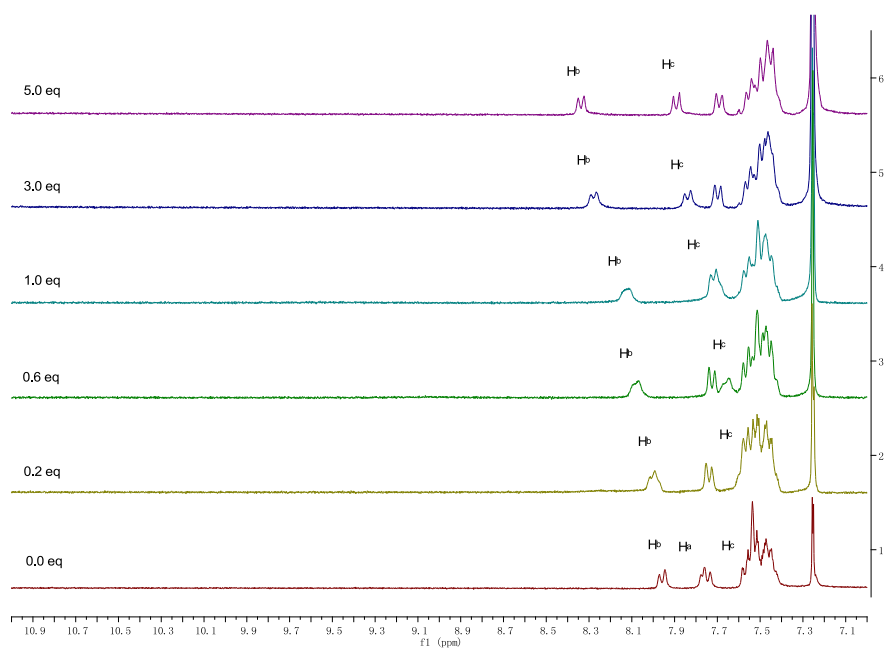

**Figure S30.** The <sup>1</sup>H NMR spectral changes of **3b** upon addition of F<sup>-</sup> in CDCl<sub>3</sub> at 298 K.

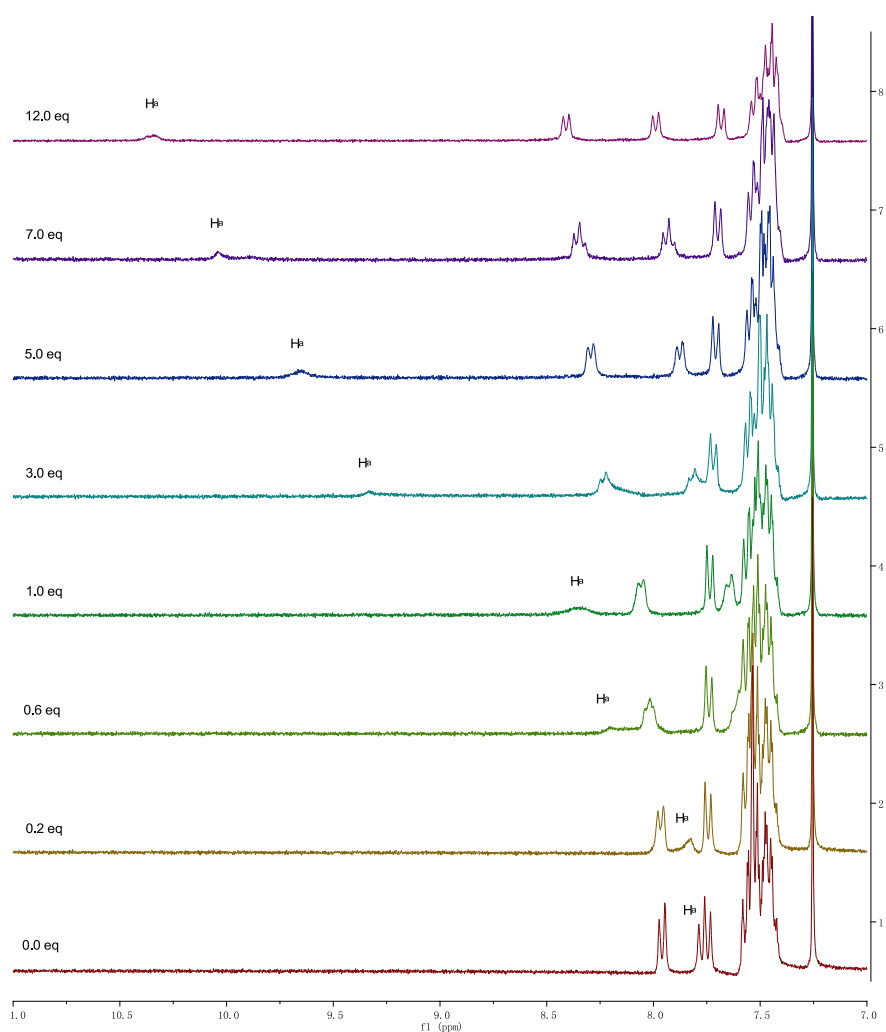

**Figure S31.** The  $^1\text{H}$  NMR spectral changes of **3b** upon addition of  $\text{Cl}^-$  in  $\text{CDCl}_3$  at 298 K.

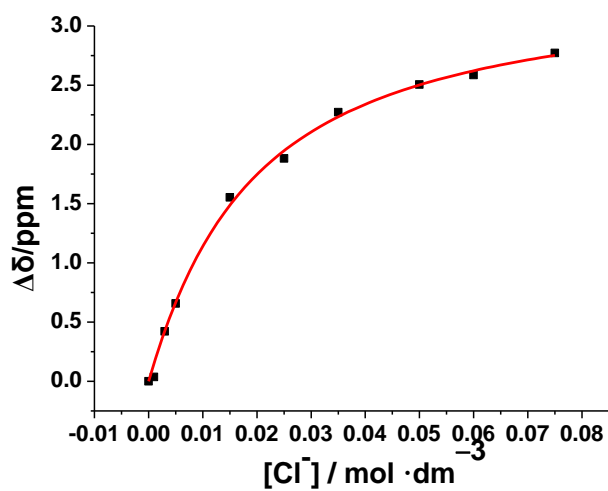

**Figure S32.** A plot of the chemical shift change of amide proton  $\text{H}_a$  as a function of  $[\text{Cl}^-]$  and its theoretical fit for the 1:1 binding of **3b** with  $\text{Cl}^-$ .

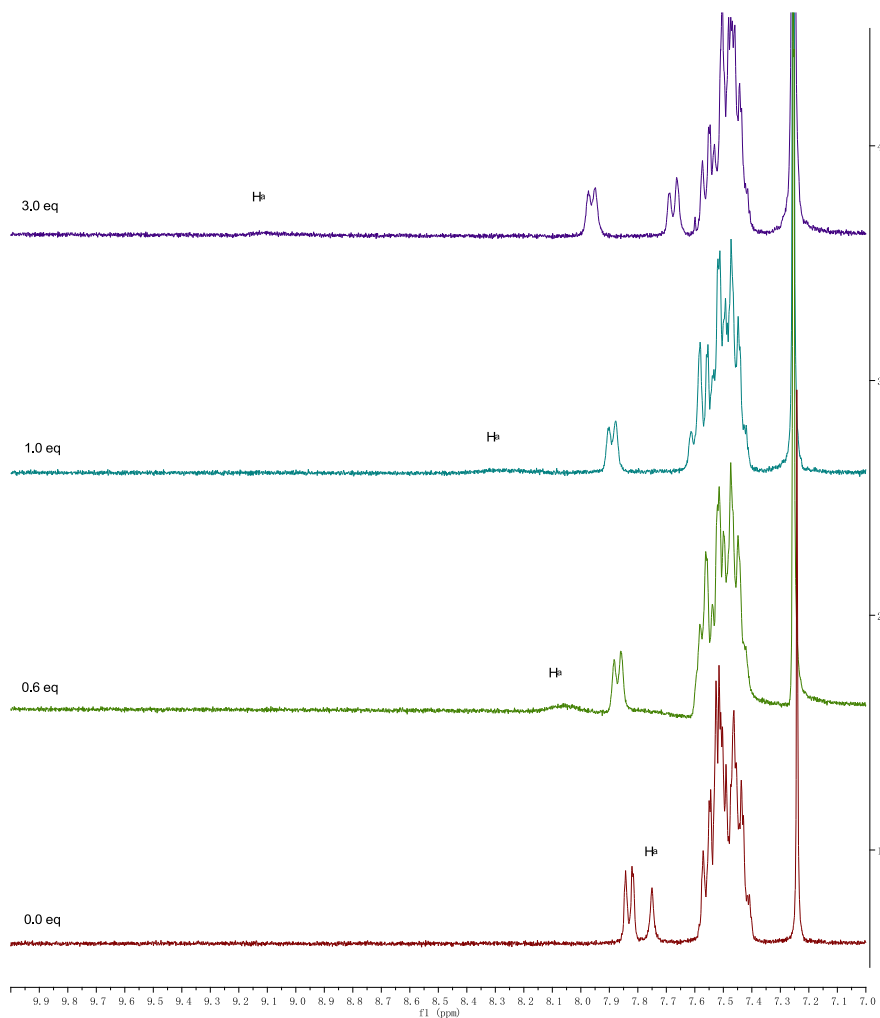

**Figure S33.** The  $^1\text{H}$  NMR spectral changes of **3c** upon addition of  $\text{F}^-$  in  $\text{CDCl}_3$  at 298 K.

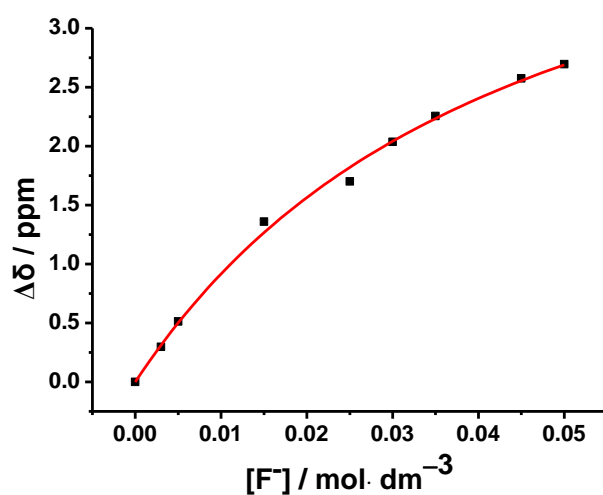

**Figure S34.** A plot of the chemical shift change of amide proton  $\text{H}_a$  as a function of  $[\text{F}^-]$  and its theoretical fit for the 1:1 binding of **3c** with  $\text{F}^-$ .

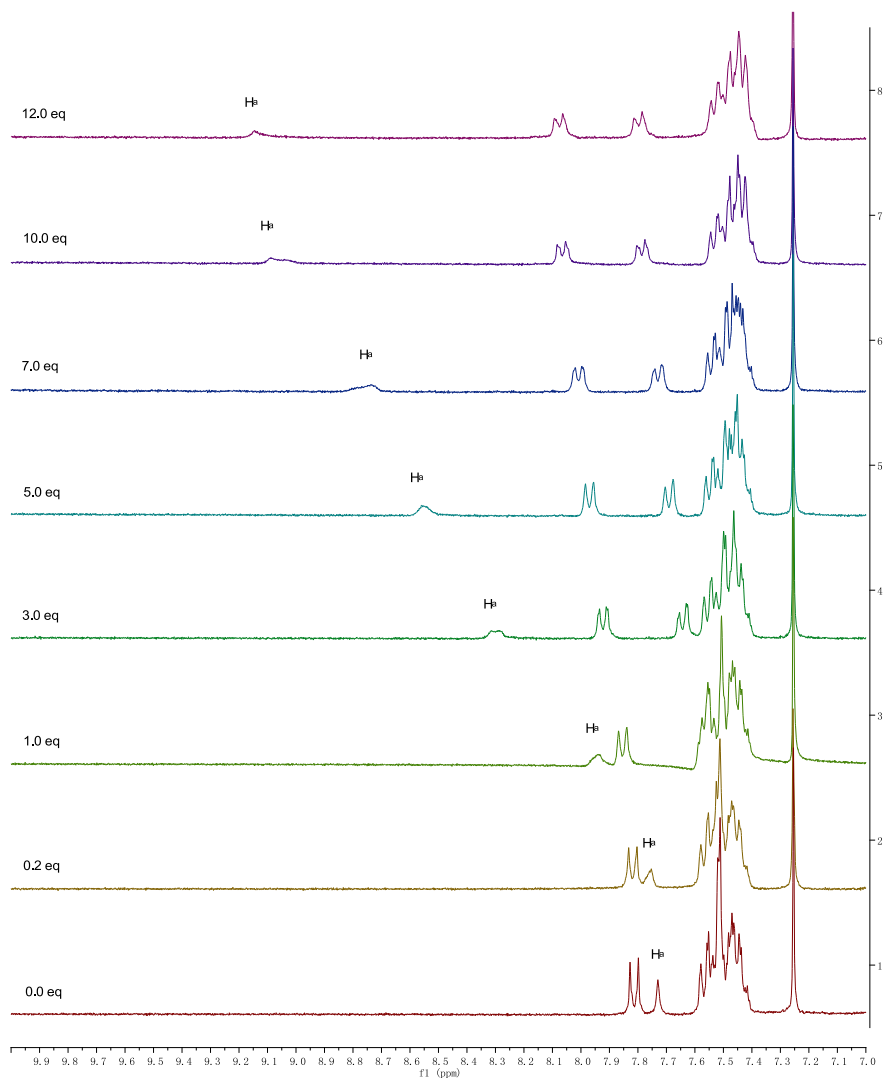

**Figure S35.** The  $^1\text{H}$  NMR spectral changes of **3c** upon addition of  $\text{Cl}^-$  in  $\text{CDCl}_3$  at 298 K.

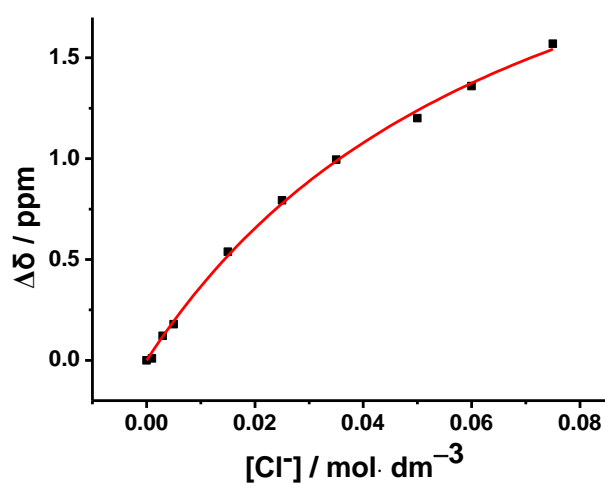

**Figure S36.** A plot of the chemical shift change of amide proton  $\text{H}_a$  as a function of  $[\text{Cl}^-]$  and its theoretical fit for the 1:1 binding of **3c** with  $\text{Cl}^-$ .

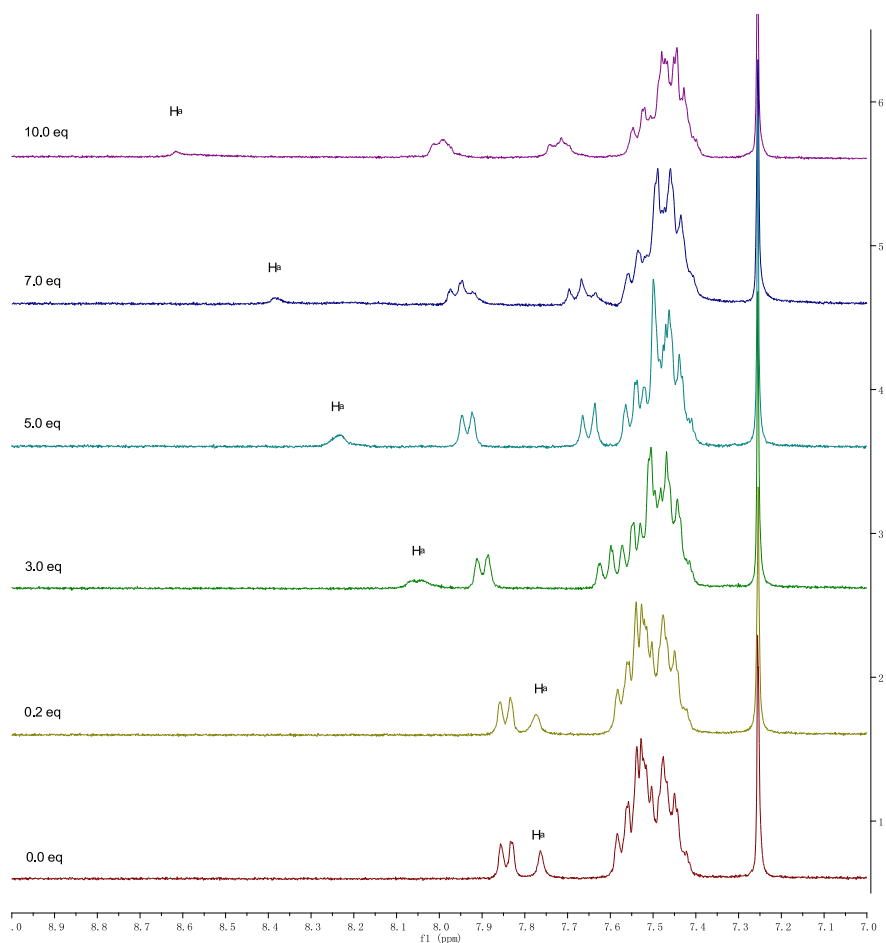

**Figure S37.** The  $^1\text{H}$  NMR spectral changes of **3c** upon addition of  $\text{Br}^-$  in  $\text{CDCl}_3$  at 298 K.

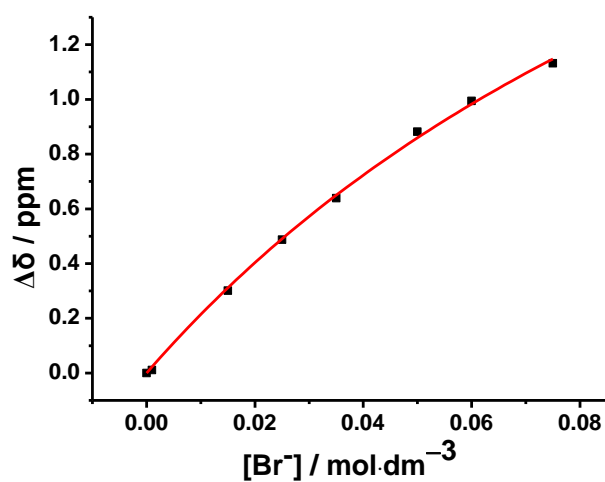

**Figure S38.** A plot of the chemical shift change of amide proton  $\text{H}_a$  as a function of  $[\text{Br}^-]$  and its theoretical fit for the 1:1 binding of **3c** with  $\text{Br}^-$ .

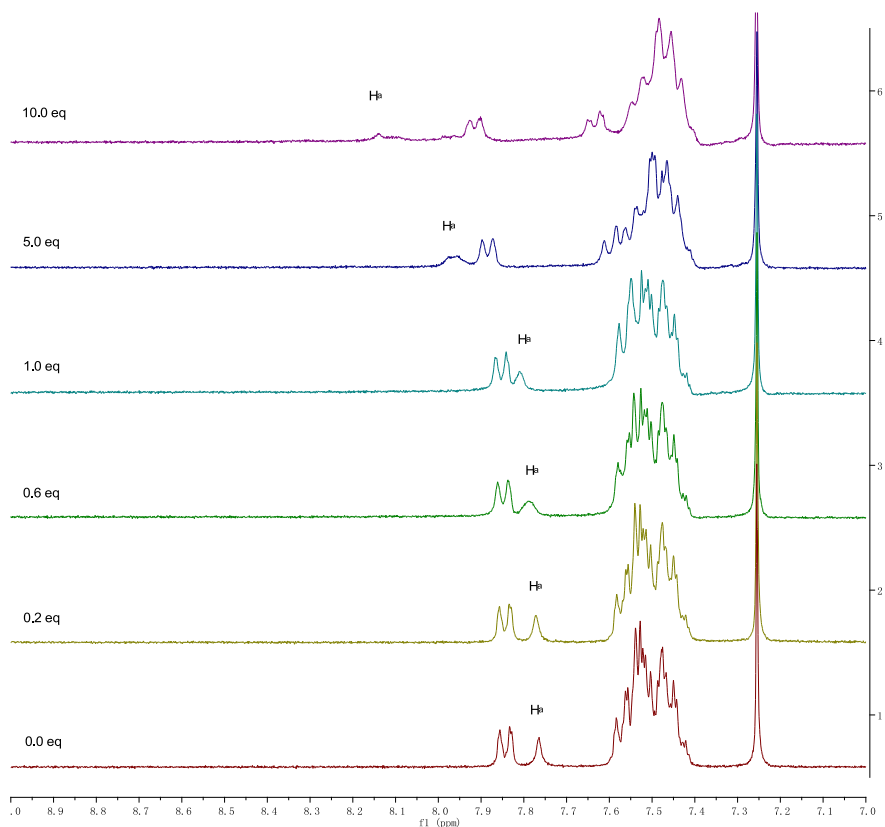

**Figure S39.** The  $^1\text{H}$  NMR spectral changes of **3c** upon addition of  $\Gamma^-$  in  $\text{CDCl}_3$  at 298 K.

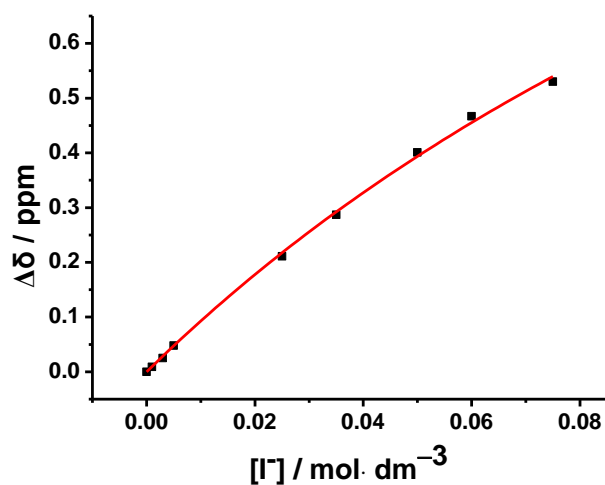

**Figure S40.** A plot of the chemical shift change of amide proton  $\text{H}_a$  as a function of  $[\Gamma^-]$  and its theoretical fit for the 1:1 binding of **3c** with  $\Gamma^-$ .



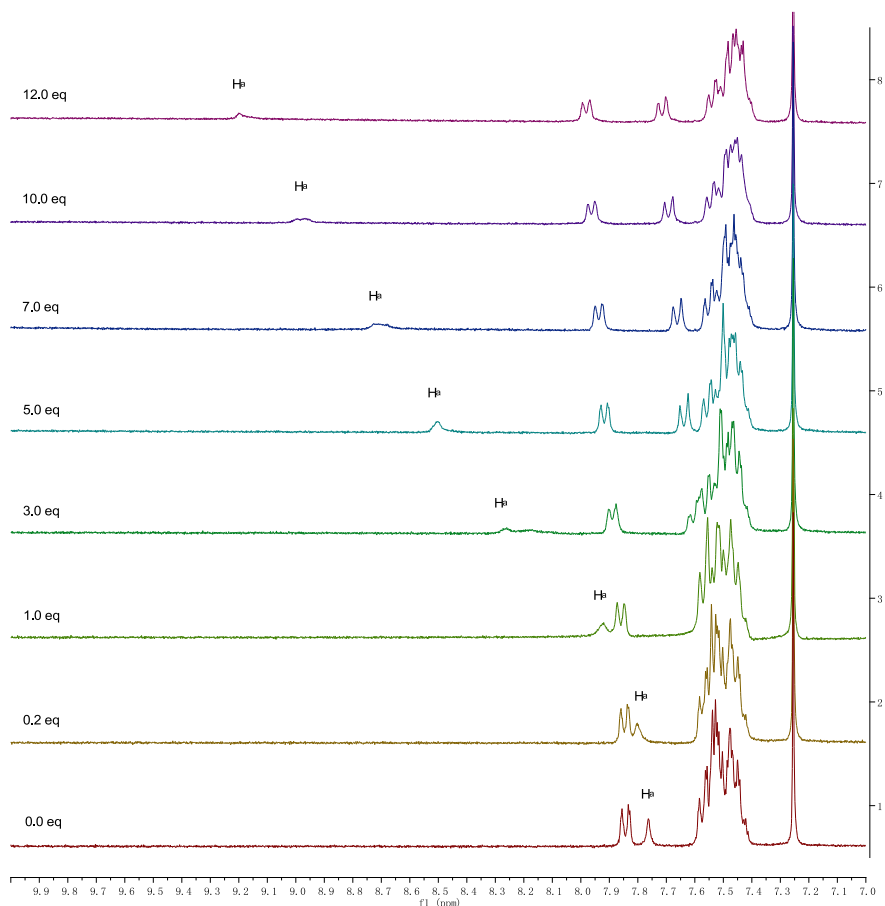

**Figure S41.** The <sup>1</sup>H NMR spectral changes of **3c** upon addition of OAc<sup>-</sup> in CDCl<sub>3</sub> at 298 K.

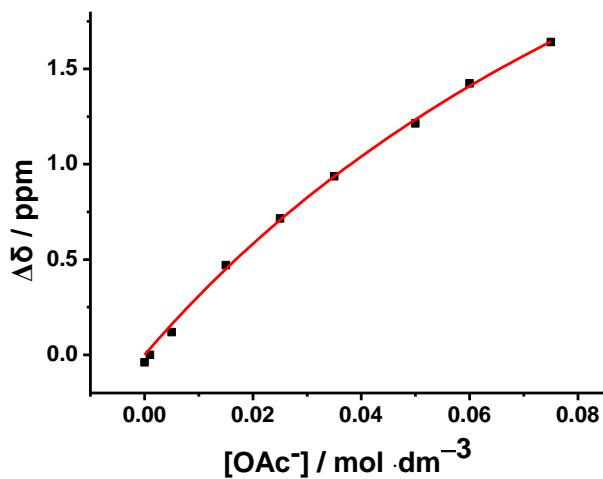

**Figure S42.** A plot of the chemical shift change of amide proton H<sub>a</sub> as a function of [AcO<sup>-</sup>] and its theoretical fit for the 1:1 binding of **3c** with AcO<sup>-</sup>.

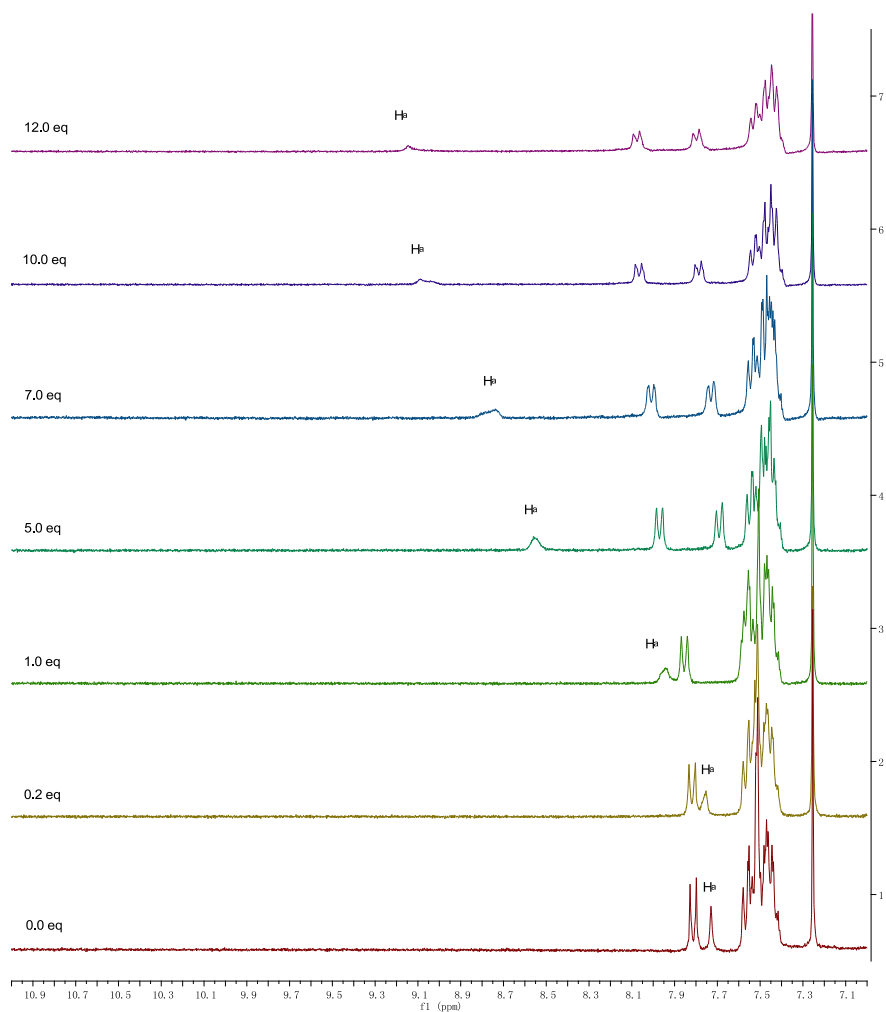

**Figure S43.** The  $^1\text{H}$  NMR spectral changes of **3d** upon addition of  $\text{Cl}^-$  in  $\text{CDCl}_3$  at 298 K.

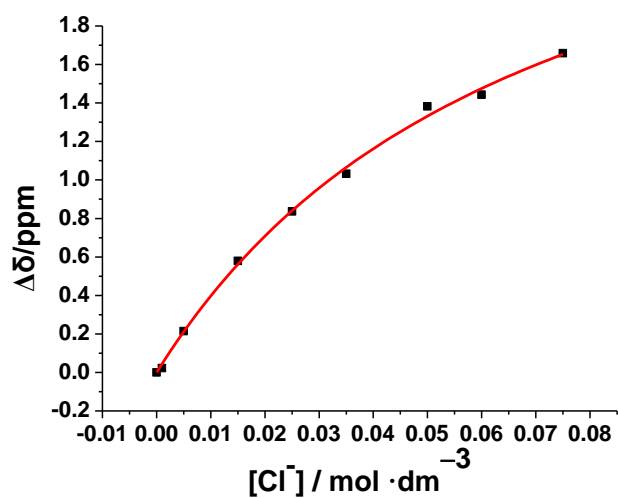

**Figure S44.** A plot of the chemical shift change of amide proton  $\text{H}_a$  as a function of  $[\text{Cl}^-]$  and its theoretical fit for the 1:1 binding of **3d** with  $\text{Cl}^-$ .

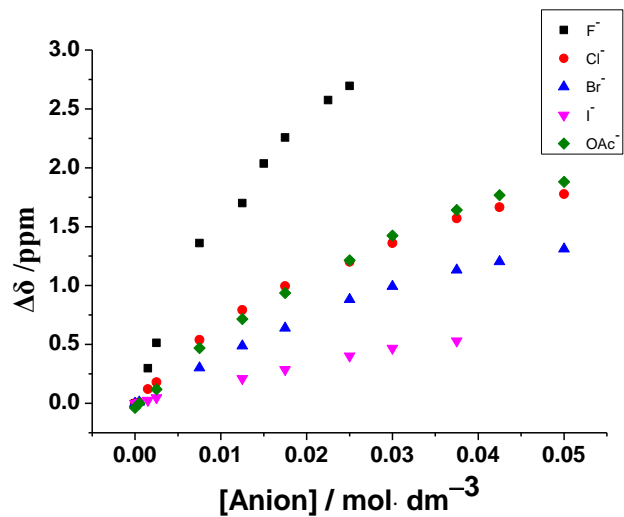

**Figure S45.** The shifts of the signals of amide N–H ( $H_a$ ) of **3c** upon addition of different anions with different concentrations in  $CDCl_3$  at 298 K.

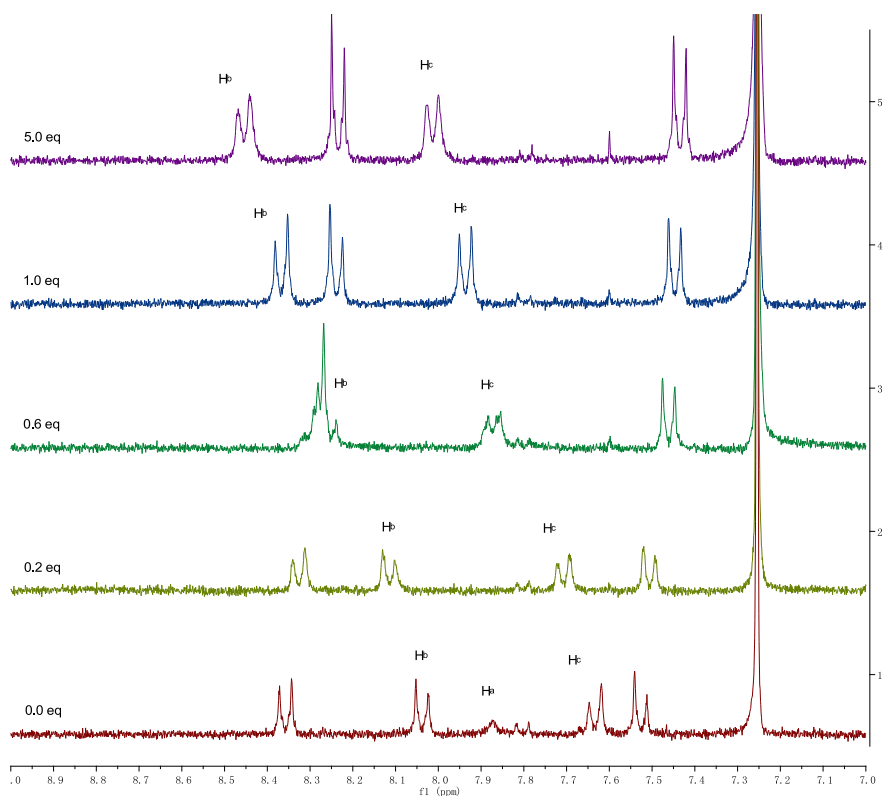

**Figure S46.** The  $^1H$  NMR spectral changes of **4a** upon addition of  $F^-$  in  $CDCl_3$  at 298 K.

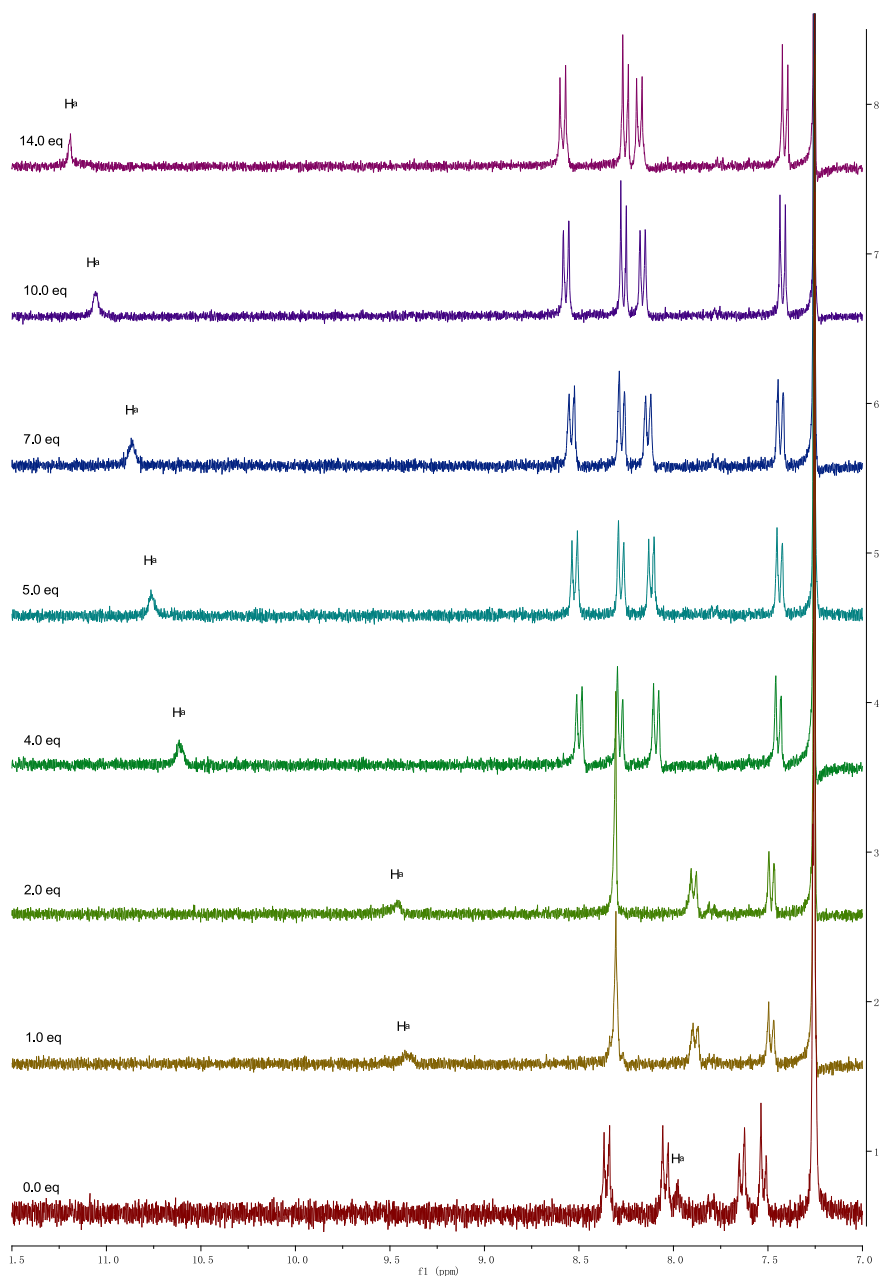

**Figure S47.** The  $^1\text{H}$  NMR spectral changes of **4a** upon addition of  $\text{Cl}^-$  in  $\text{CDCl}_3$  at 298 K.

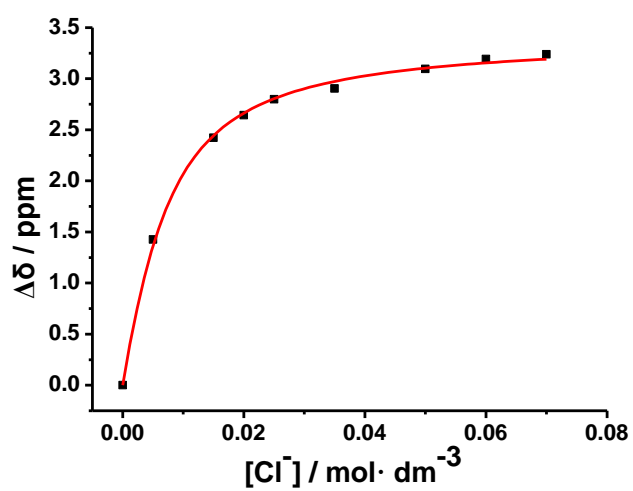

**Figure S48.** A plot of the chemical shift change of amide proton  $H_a$  as a function of  $[Cl^-]$  and its theoretical fit for the 1:1 binding of **4a** with  $Cl^-$ .

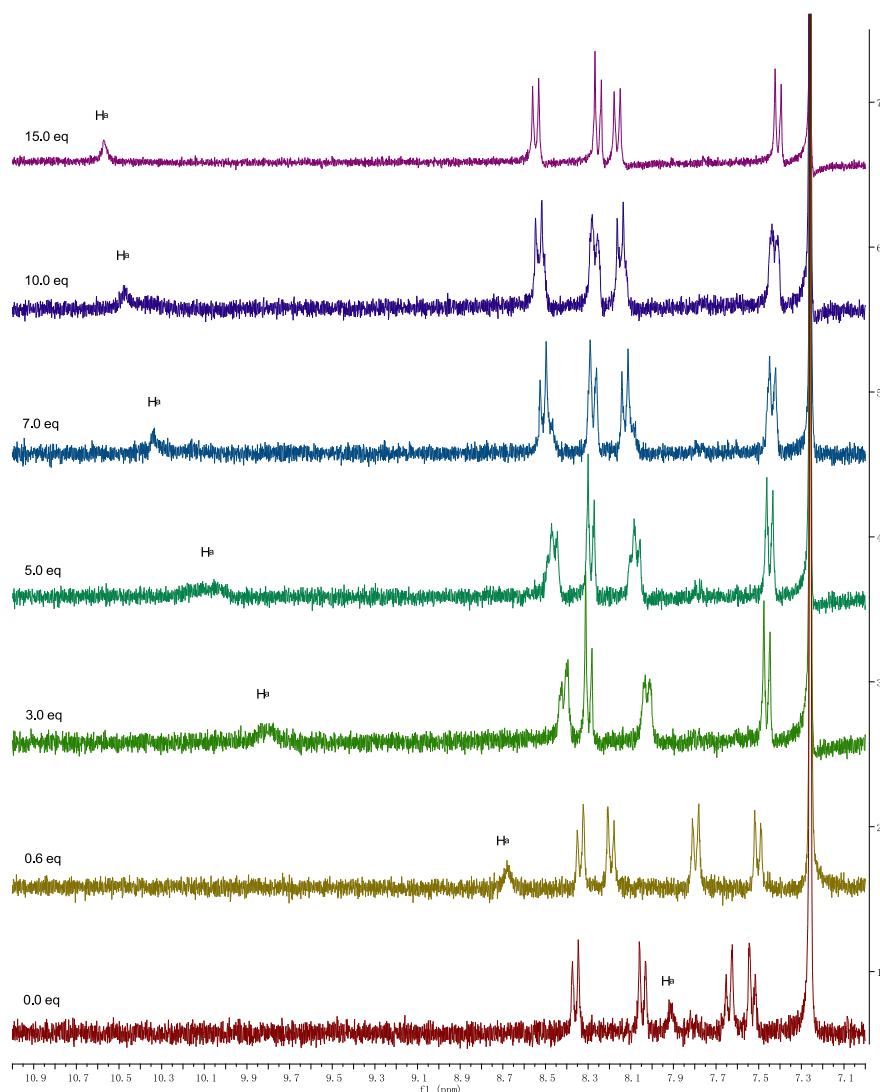

**Figure S49.** The  $^1\text{H}$  NMR spectral changes of **4a** upon addition of  $\text{Br}^-$  in  $\text{CDCl}_3$  at 298 K.

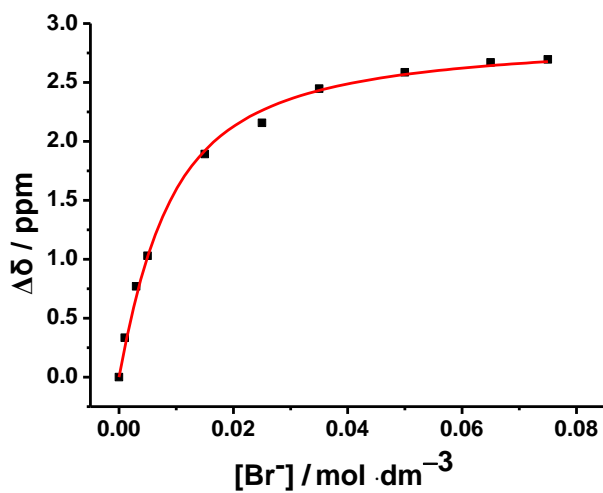

**Figure S50.** A plot of the chemical shift change of amide proton  $\text{H}_a$  as a function of  $[\text{Br}^-]$  and its theoretical fit for the 1:1 binding of **4a** with  $\text{Br}^-$ .

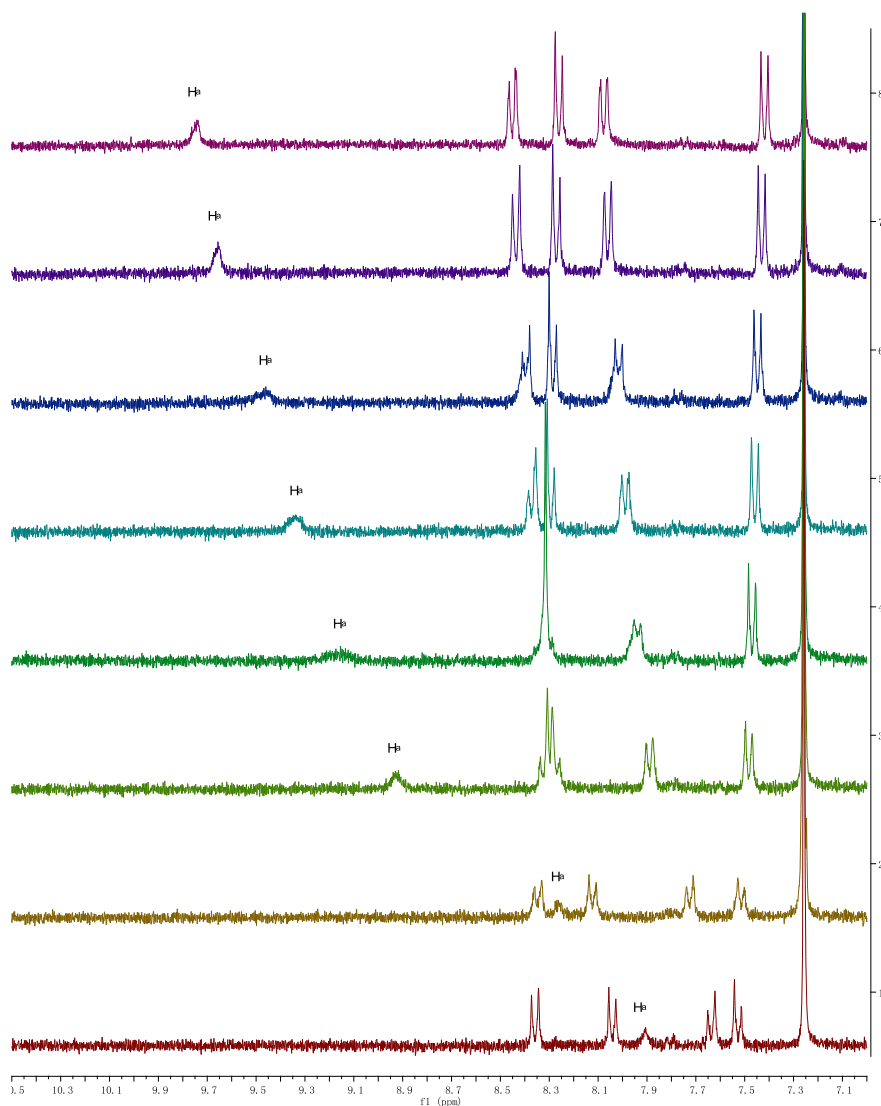

**Figure S51.** The  $^1\text{H}$  NMR spectral changes of **4a** upon addition of  $\Gamma$  in  $\text{CDCl}_3$  at 298 K.

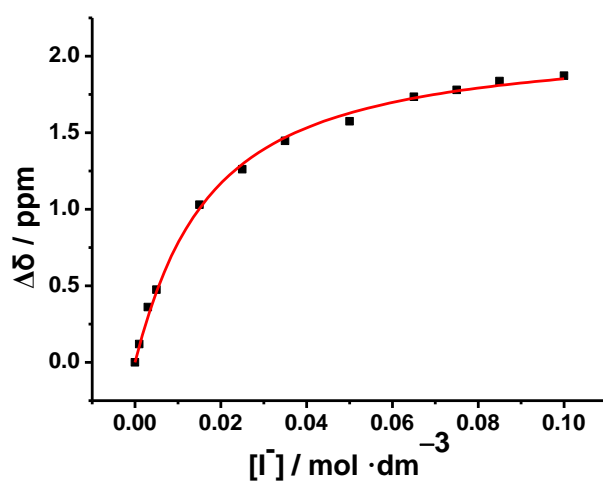

**Figure S52.** A plot of the chemical shift change of amide proton  $\text{H}_a$  as a function of  $[\Gamma^-]$  and its theoretical fit for the 1:1 binding of **4a** with  $\Gamma^-$ .

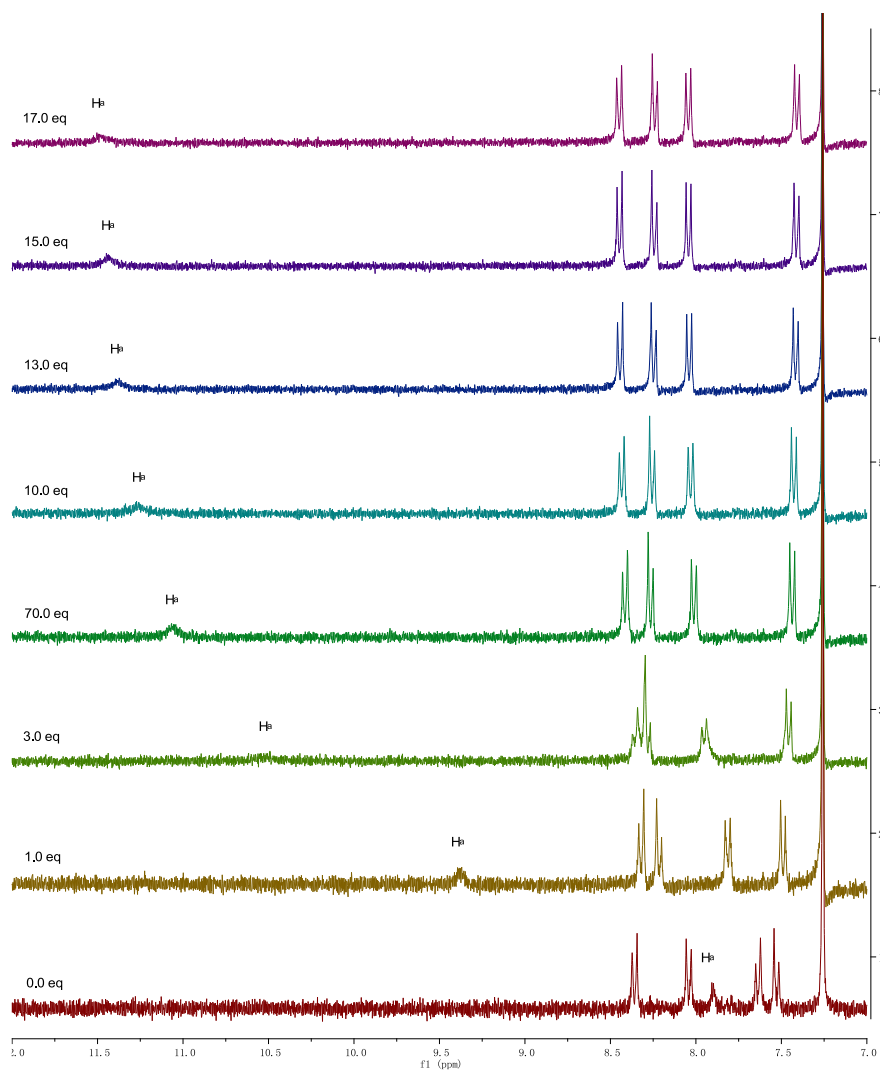

**Figure S53.** The  $^1\text{H}$  NMR spectral changes of **4a** upon addition of  $\text{OAc}^-$  in  $\text{CDCl}_3$  at 298 K.

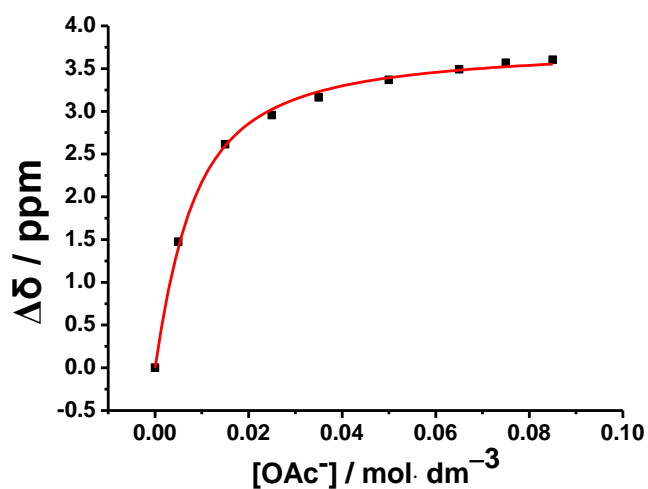

**Figure S54.** A plot of the chemical shift change of amide proton  $\text{H}_a$  as a function of  $[\text{AcO}^-]$  and its theoretical fit for the 1:1 binding of **4a** with  $\text{AcO}^-$ .



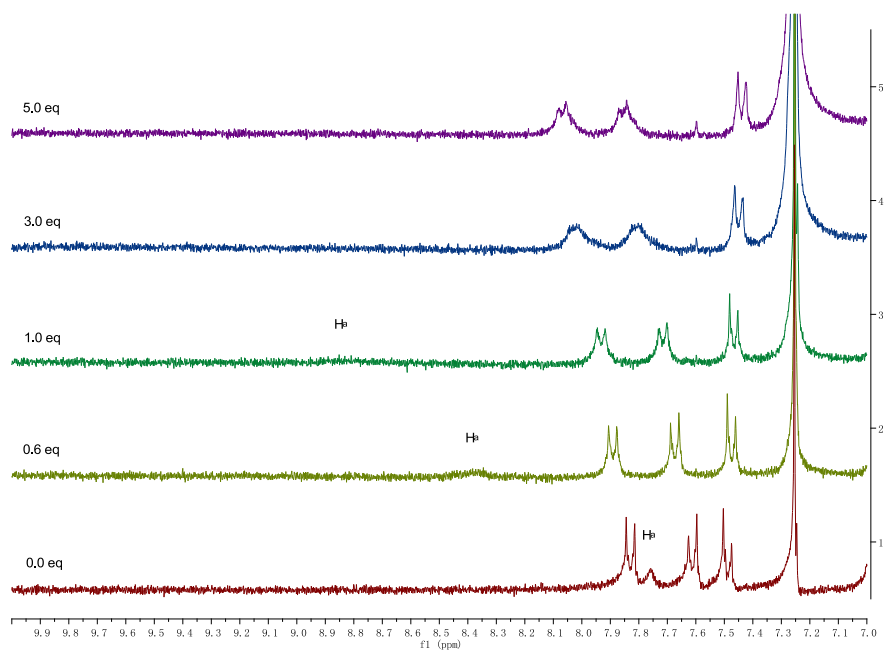

**Figure S55.** The  $^1\text{H}$  NMR spectral changes of **4d** upon addition of  $\text{F}^-$  in  $\text{CDCl}_3$  at 298 K.

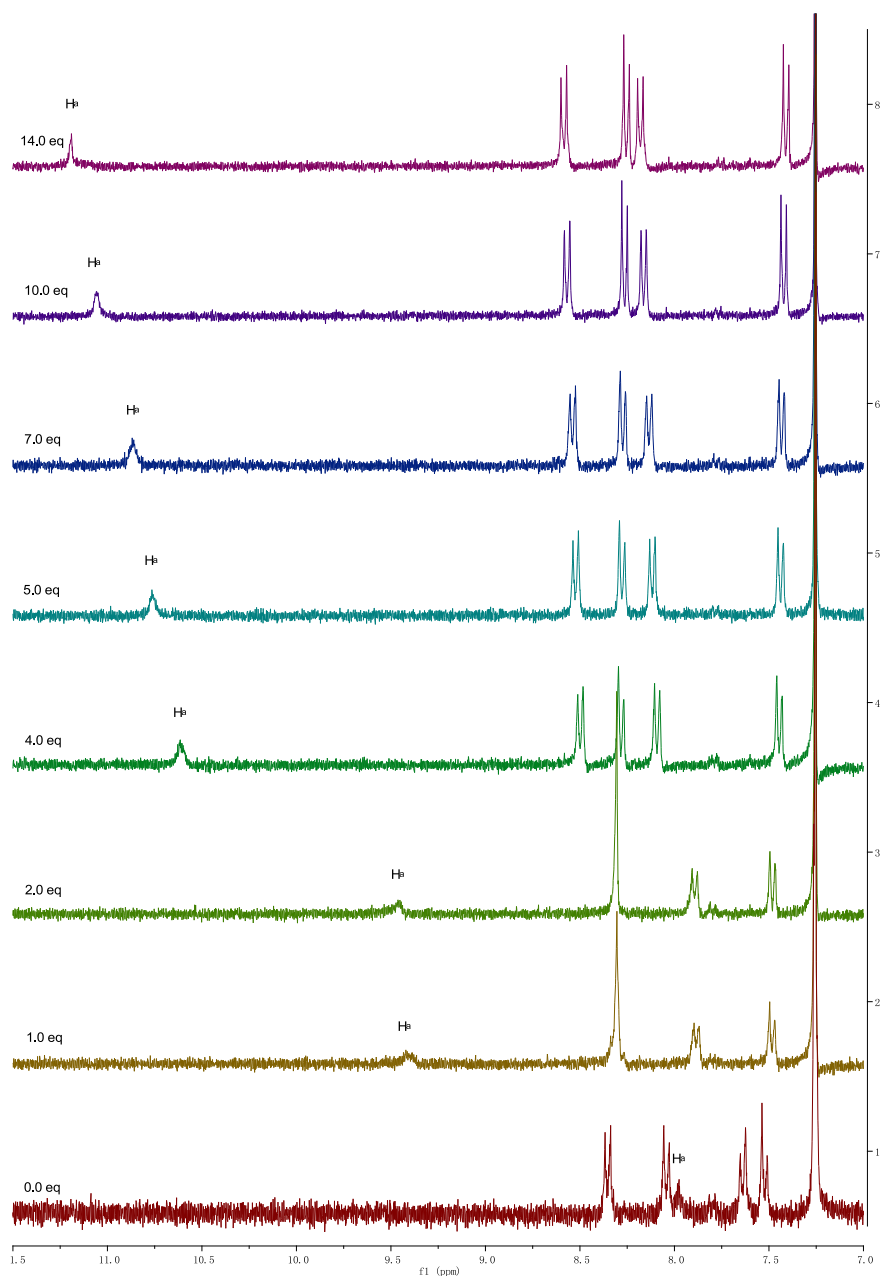

**Figure S56.** The  $^1\text{H}$  NMR spectral changes of **4d** upon addition of  $\text{Cl}^-$  in  $\text{CDCl}_3$  at 298 K.

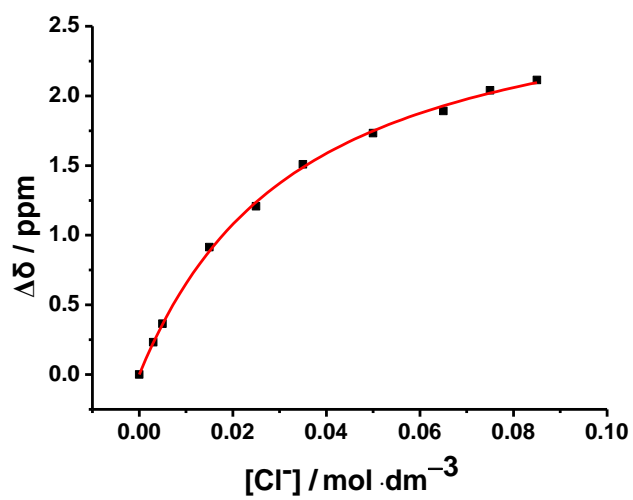

**Figure S57.** A plot of the chemical shift change of amide proton  $\text{H}_a$  as a function of  $[\text{Cl}^-]$  and its theoretical fit for the 1:1 binding of **4d** with  $\text{Cl}^-$ .

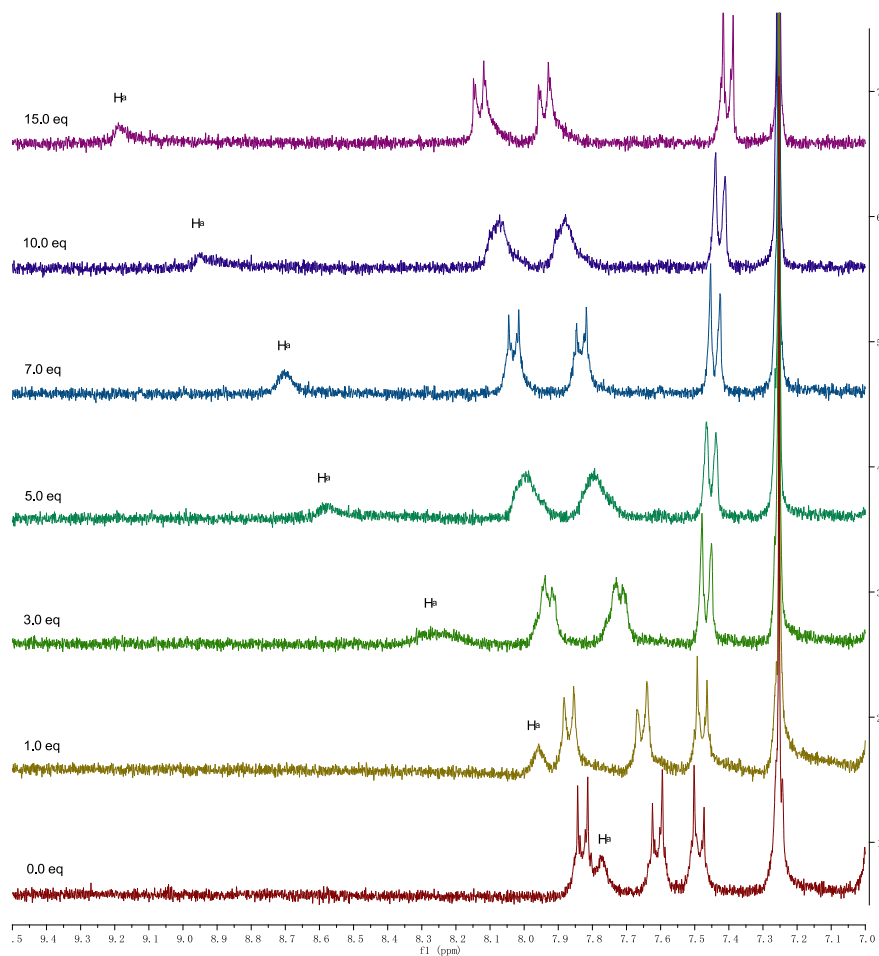

**Figure S58.** The  $^1\text{H}$  NMR spectral changes of **4d** upon addition of  $\text{Br}^-$  in  $\text{CDCl}_3$  at 298 K.

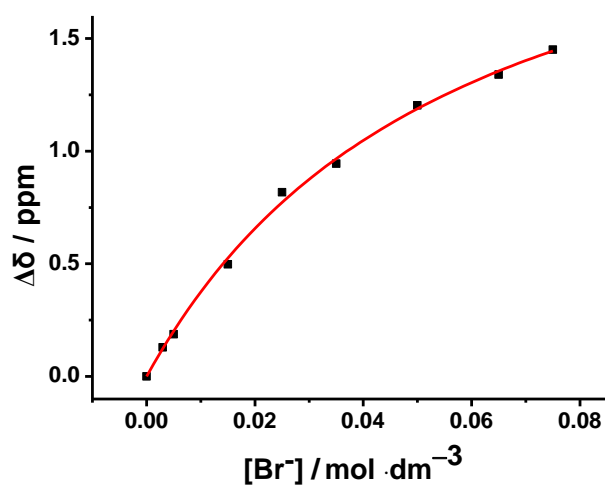

**Figure S59.** A plot of the chemical shift change of amide proton  $\text{H}_a$  as a function of  $[\text{Br}^-]$  and its theoretical fit for the 1:1 binding of **4d** with  $\text{Br}^-$ .

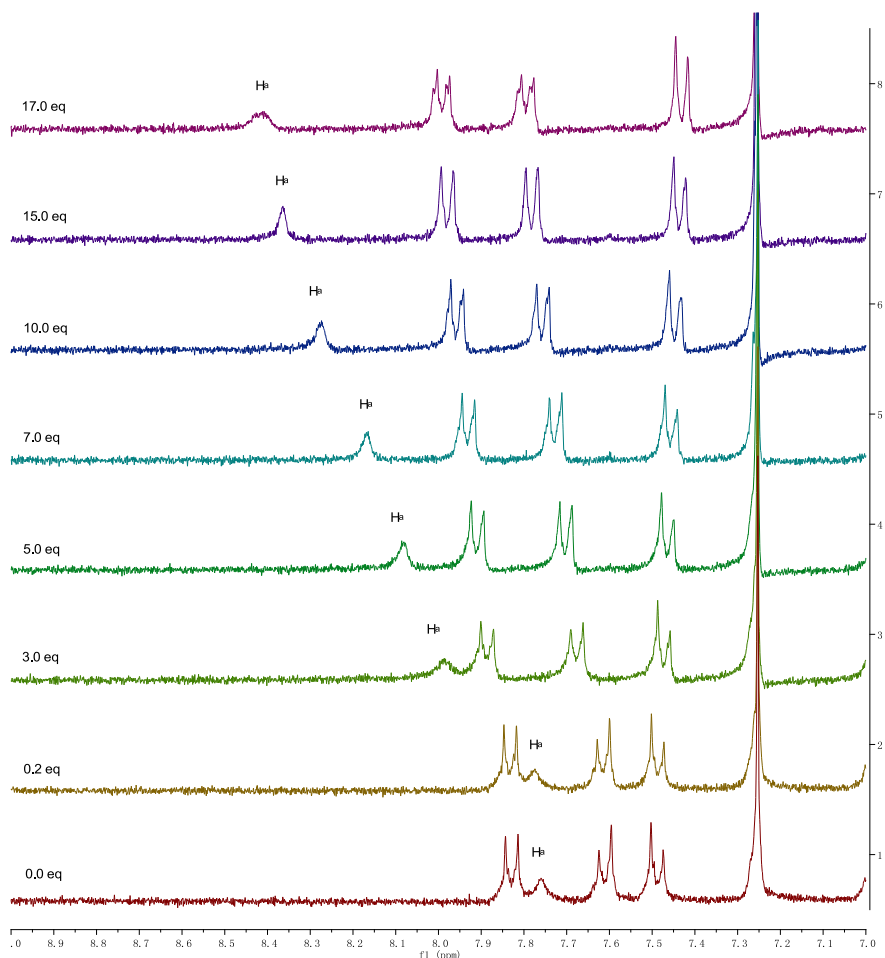

**Figure S60.** The  $^1\text{H}$  NMR spectral changes of **4d** upon addition of  $\text{I}^-$  in  $\text{CDCl}_3$  at 298K.

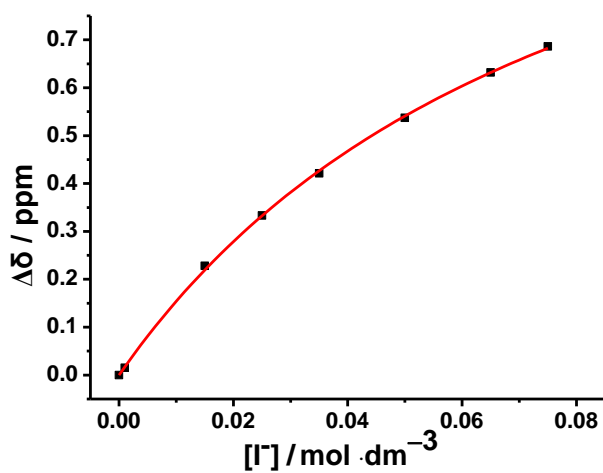

**Figure S61.** A plot of the chemical shift change of amide proton  $\text{H}_a$  as a function of  $[\text{I}^-]$  and its theoretical fit for the 1:1 binding of **4d** with  $\text{I}^-$ .

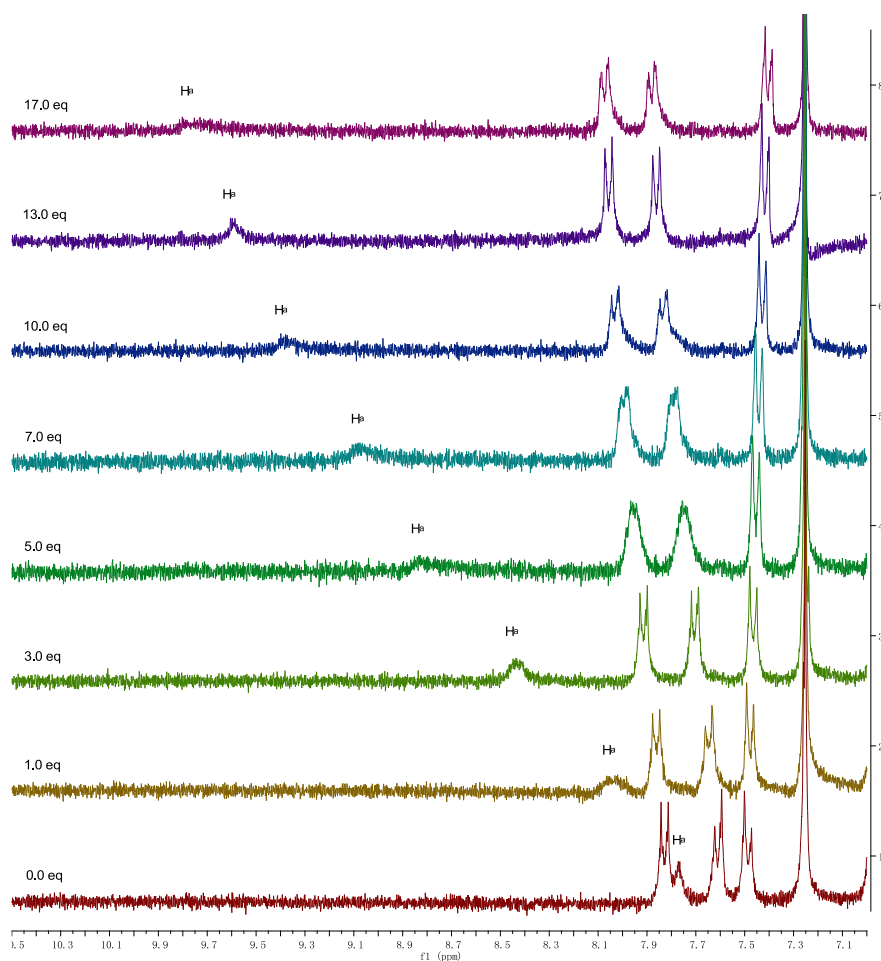

**Figure S62.** The <sup>1</sup>H NMR spectral changes of **4d** upon addition of OAc<sup>-</sup> in CDCl<sub>3</sub> at 298 K.

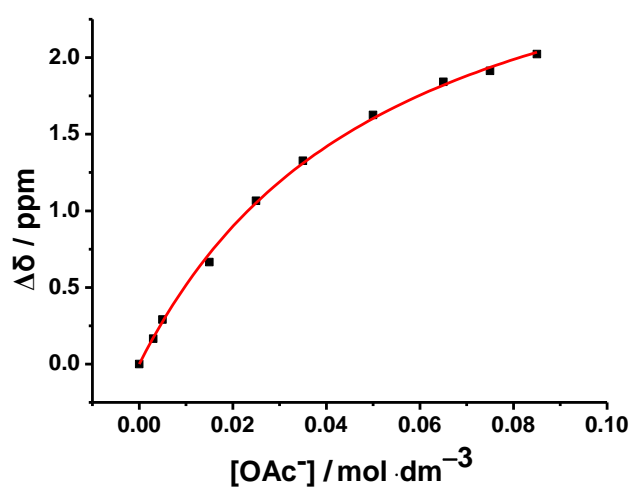

**Figure S63.** A plot of the chemical shift change of amide proton H<sub>a</sub> as a function of [AcO<sup>-</sup>] and its theoretical fit for the 1:1 binding of **4d** with AcO<sup>-</sup>.

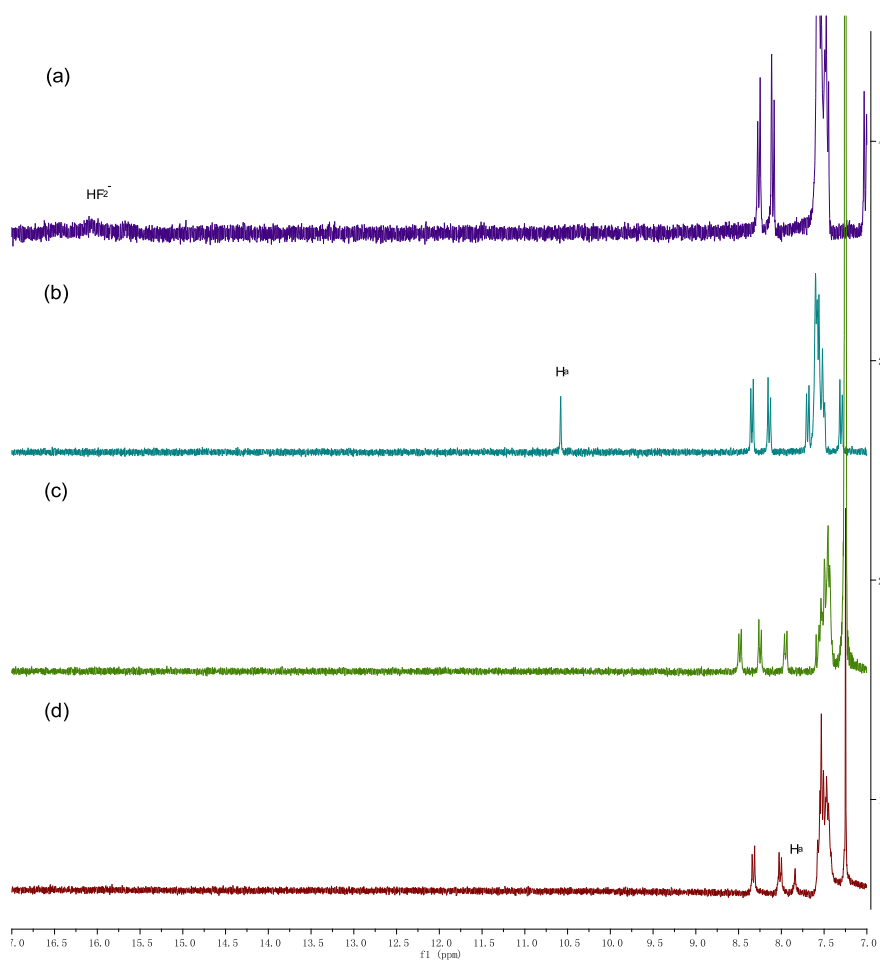

**Figure S64.** The  $^1\text{H}$  NMR spectrum of (a) **3a** + 10 eq of  $\text{F}^-$  ( $\text{DMSO-d}_6$ , 298 K), (b) **3a** ( $\text{DMSO-d}_6$ , 298 K), (c) **3a** + 10 eq of  $\text{F}^-$  ( $\text{CDCl}_3$ , 298 K), and (d) **3a** ( $\text{CDCl}_3$ , 298 K), ( $[\mathbf{3a}] = 5.0 \times 10^{-3} \text{ mol dm}^{-3}$ ).

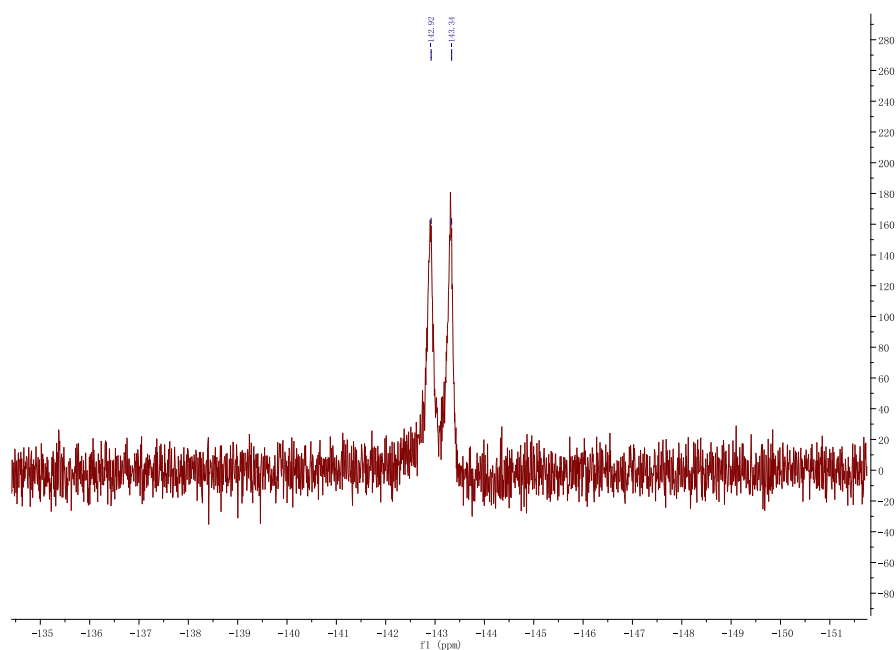

**Figure S65.** The  $^{19}\text{F}$  NMR spectrum of **3a** ( $5.0 \times 10^{-3} \text{ mol dm}^{-3}$ ) + 10 eq of  $\text{F}^-$  in  $\text{DMSO-d}_6$  at 298 K.

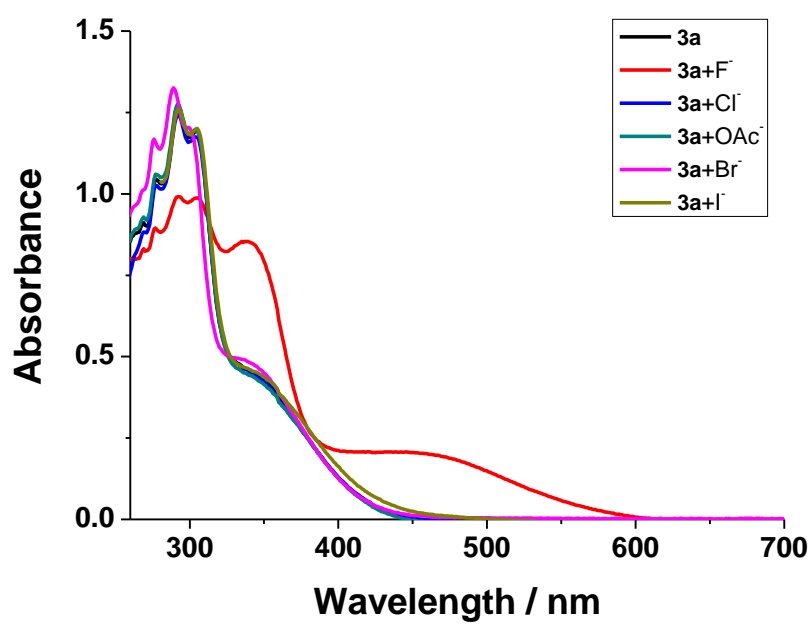

**Figure S66.** The UV-vis spectra of **3a** ( $3.96 \times 10^{-5} \text{ mol dm}^{-3}$ ) in DMSO in the presence of 50 eq of  $\text{F}^-$ ,  $\text{Cl}^-$ ,  $\text{Br}^-$ ,  $\text{I}^-$ , or  $\text{OAc}^-$ .

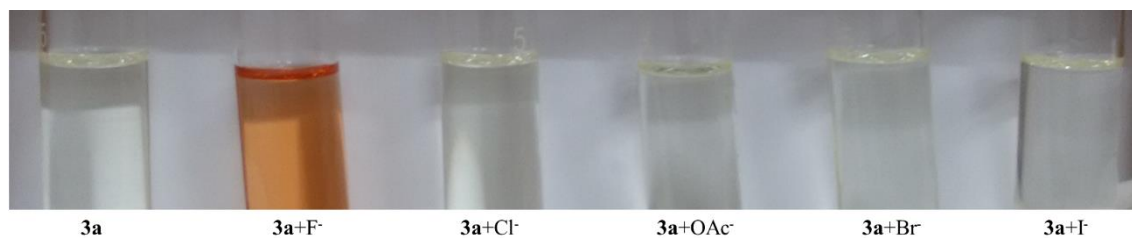

**Figure S67.** Colors of **3a** ( $3.96 \times 10^{-5} \text{ mol dm}^{-3}$ ) in DMSO in the presence of 50 eq of  $\text{F}^-$ ,  $\text{Cl}^-$ ,  $\text{Br}^-$ ,  $\text{I}^-$ , or  $\text{OAc}^-$ .
